# Supplementary material
Source: Royal Society of Chemistry journal article supplement (doi:10.1039/d6ee01866a)
Supplement: d6ee01866a1.pdf [file d6ee01866a1.pdf]

## Supplementary Information

### **Modulation of *d-d* orbital hybridization via creating asymmetrical paired iron sites for oxygen reduction reaction**

Zhijun Li<sup>1,\*</sup>, Hongxue Liu<sup>1</sup>, Yunlu Chen<sup>4</sup>, Siqi Ji<sup>1,\*</sup>, Xue Lu<sup>1</sup>, Wenkai Yang<sup>1</sup>, Yu Wang<sup>4</sup>, J. Hugh Horton<sup>5</sup>, Yu-Jia Tang<sup>3,\*</sup>, Xinlong Tian<sup>2,\*</sup>

<sup>1</sup> State Key Laboratory of Continental Shale Oil, Joint International Research Laboratory of Advanced Chemical Catalytic Materials & Surface Science, College of Chemistry and Chemical Engineering, Northeast Petroleum University, Daqing 163318, P. R. China

<sup>2</sup> State Key Laboratory of Tropic Ocean Engineering Materials and Materials Evaluation, School of Materials Science and Engineering, Hainan Provincial Key Lab of Fine Chem, Hainan University, Haikou 570228, P. R. China

<sup>3</sup> School of Chemistry and Materials Science, Nanjing University of Information Science & Technology, Nanjing 210044, P. R. China

<sup>4</sup> Jiangsu Collaborative Innovation Centre of Biomedical Functional Materials, School of Chemistry and Materials Science, Nanjing Normal University, Nanjing 210023, PR China

<sup>5</sup> Department of Chemistry, Queen's University, Kingston, K7L 3N6, Canada

\*Correspondence to: zhijun.li@queensu.ca; siqi.ji@nepu.edu.cn; tangyujia@nuist.edu.cn; tianxl@hainanu.edu.cn

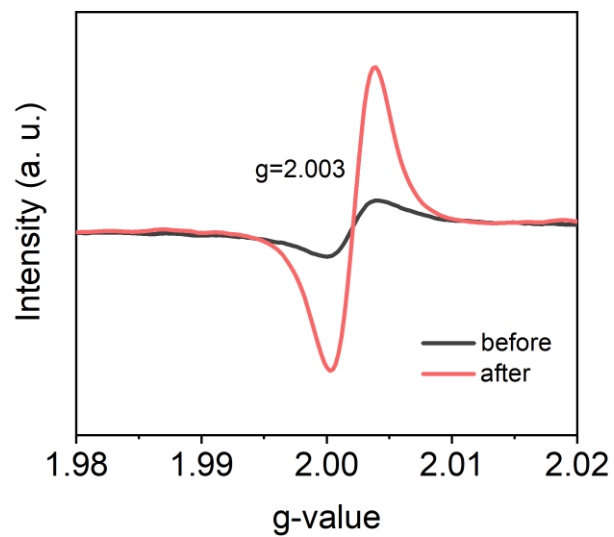

**Fig. S1.** EPR results of Fe<sub>1</sub>/NCP before and after CO<sub>2</sub> activation.

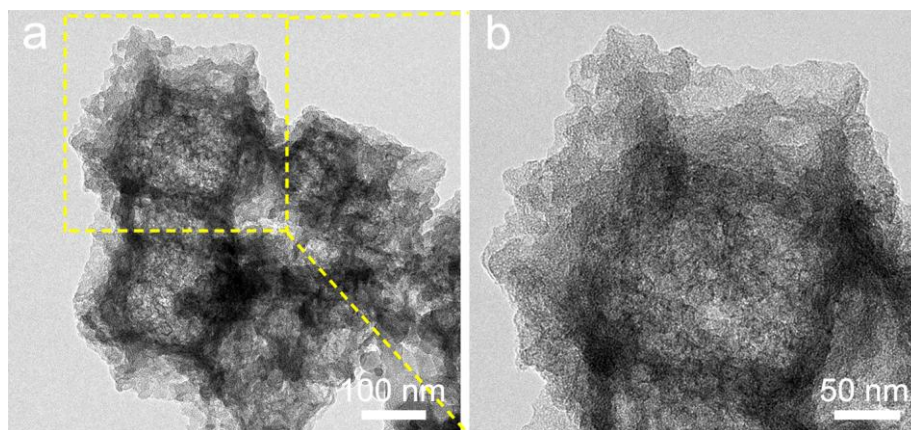

**Fig. S2.** (a) TEM image and (b) the corresponding enlarged image of Fe<sub>2</sub>/NCP.

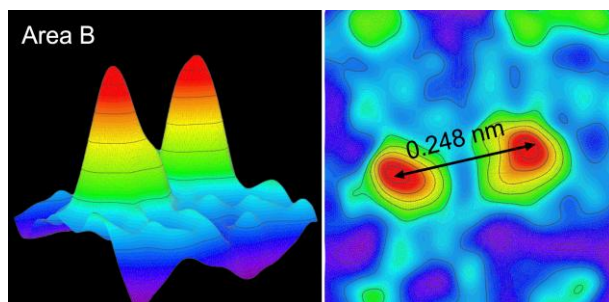

**Fig. S3.** Three-dimensional atom over-lapping Gaussian-function fitting maps of the atom pairs highlighted in the green box B in Fig. 1g.

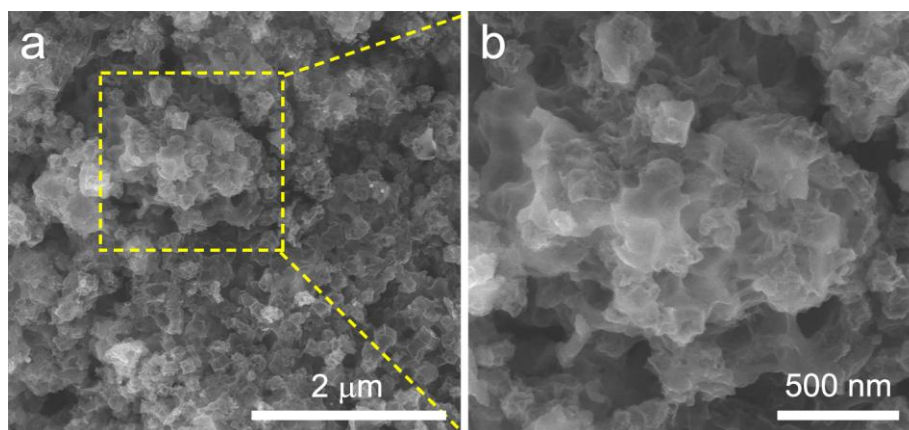

**Fig. S4.** (a) SEM image and (b) the corresponding enlarged image of  $\text{Fe}_2/\text{NC}$ .

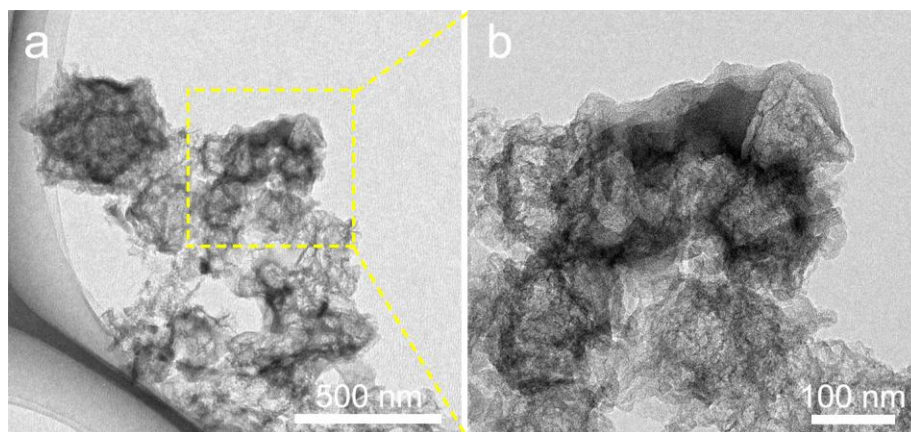

**Fig. S5.** (a) TEM image and (b) the corresponding enlarged image of  $\text{Fe}_2/\text{NC}$ .

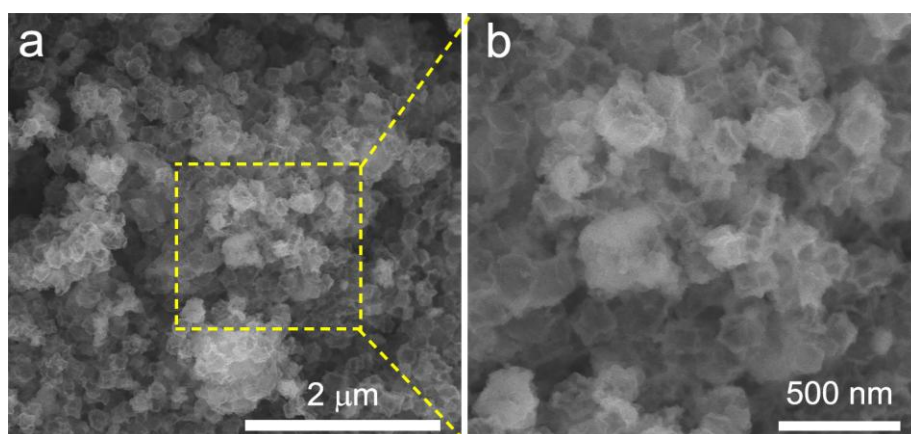

**Fig. S6.** (a) SEM image and (b) the corresponding enlarged image of  $\text{Fe}_1/\text{NC}$ .

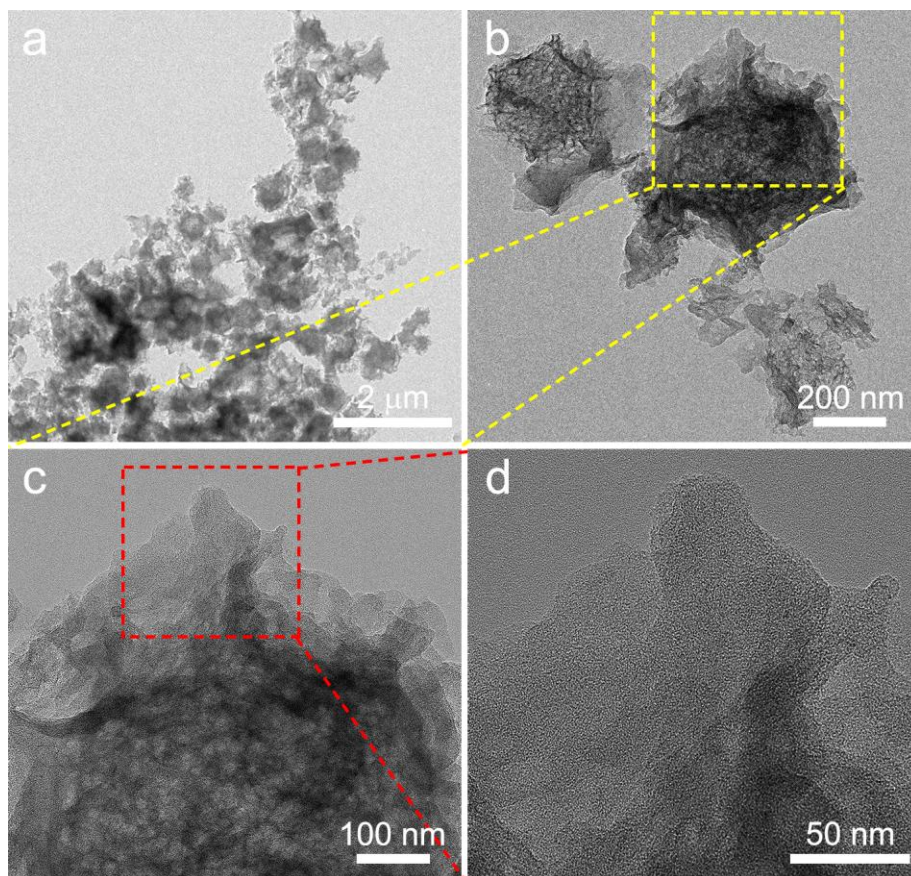

**Fig. S7.** (a,b) TEM images and (c,d) the corresponding enlarged images of Fe<sub>1</sub>/NC.

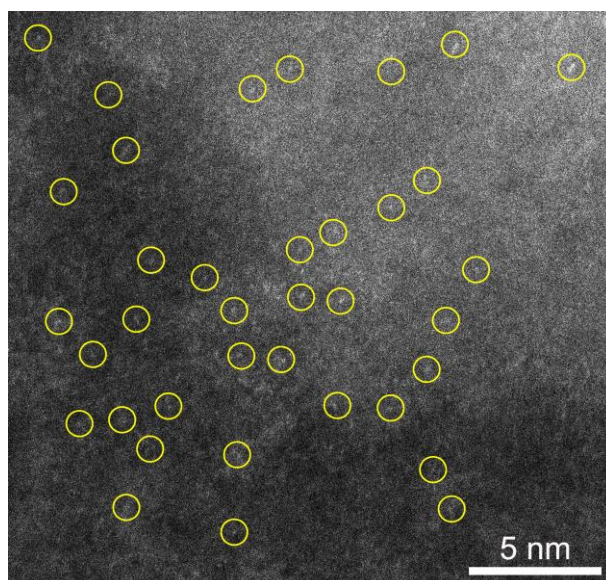

**Fig. S8.** AC HAADF-STEM image of Fe<sub>1</sub>/NC.

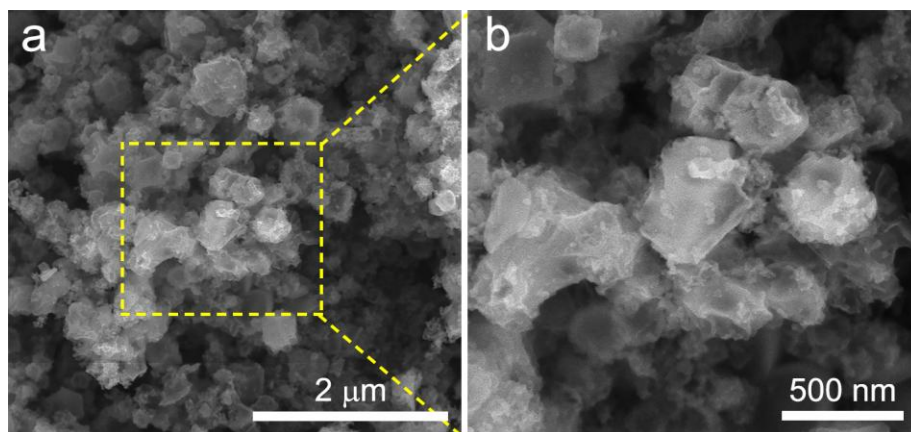

**Fig. S9.** (a) SEM image and (b) the corresponding enlarged image of NCP.

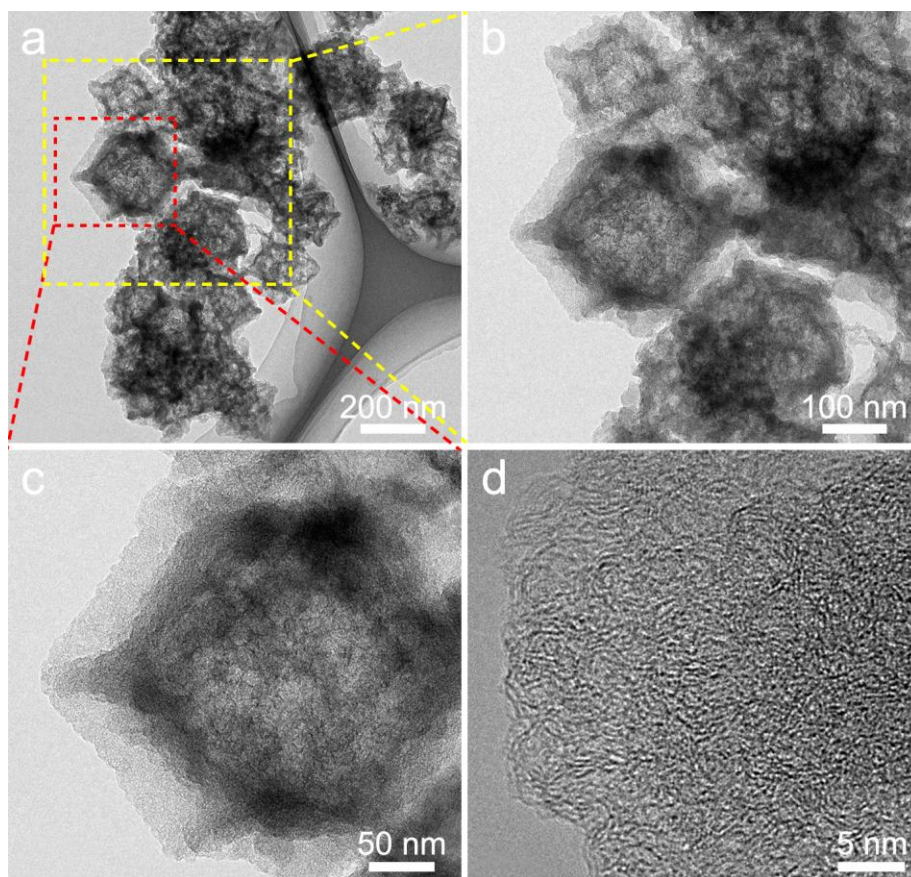

**Fig. S10.** (a) TEM image and (b,c) the corresponding enlarged images of NCP. (d) HR-TEM image of NCP.

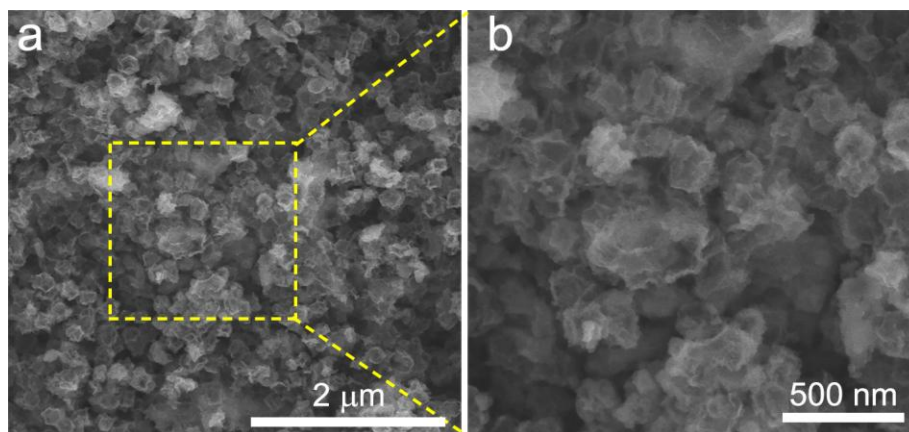

**Fig. S11.** (a) SEM image and (b) the corresponding enlarged image of NC.

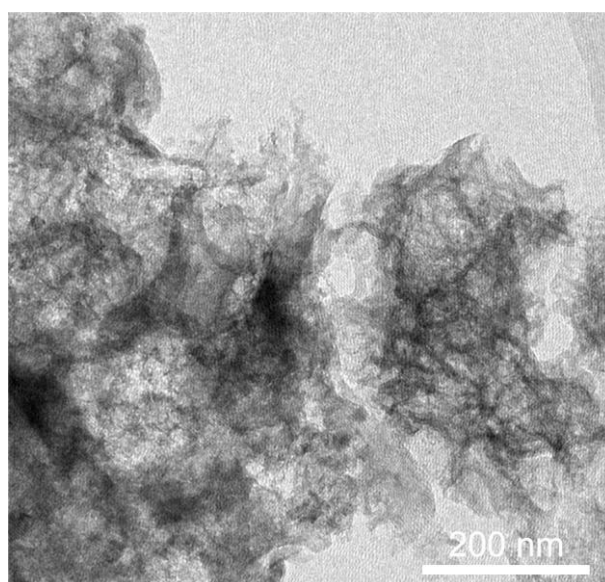

**Fig. S12.** TEM image of NC.

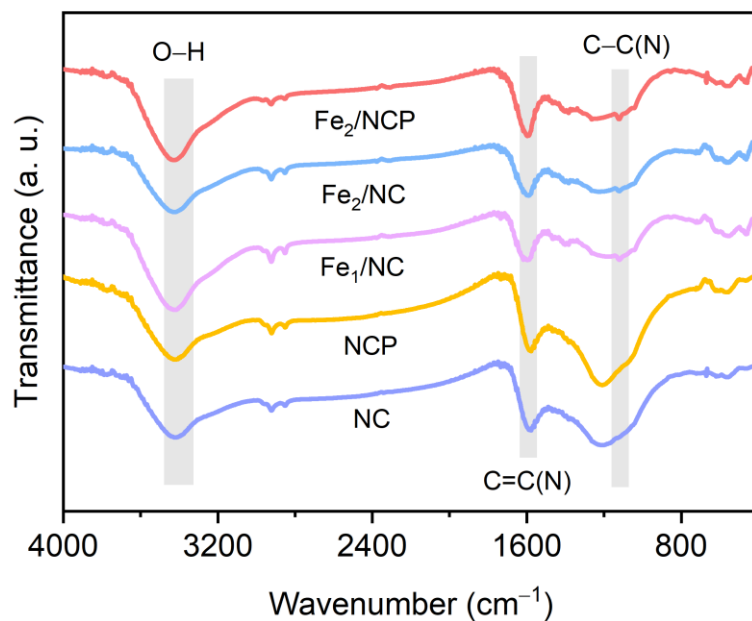

**Fig. S13.** FT-IR spectra of samples.

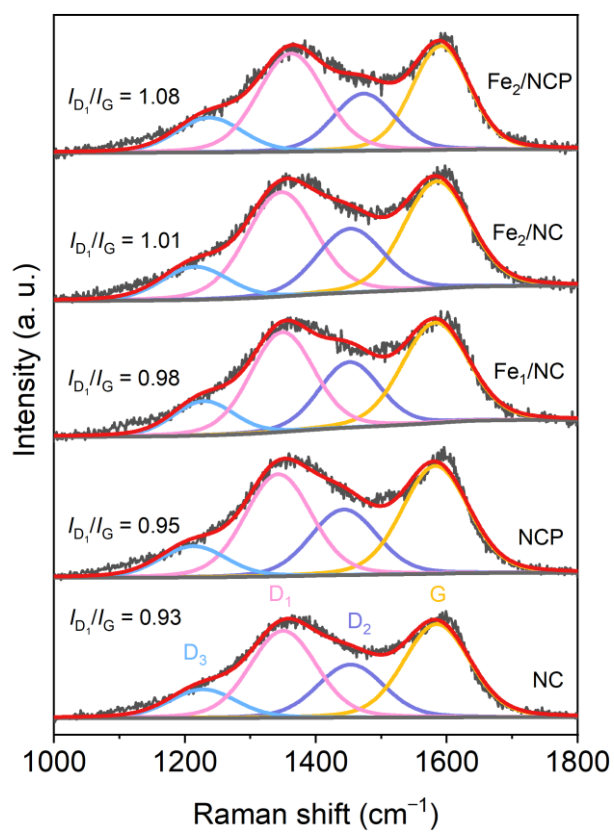

**Fig. S14.** Raman spectra of samples.

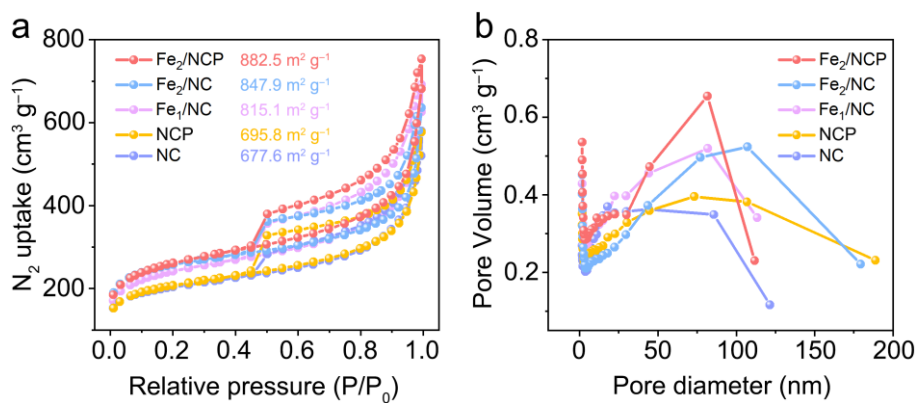

**Fig. S15.** (a) N<sub>2</sub> adsorption-desorption isotherms and (b) the corresponding pore size distributions of samples.

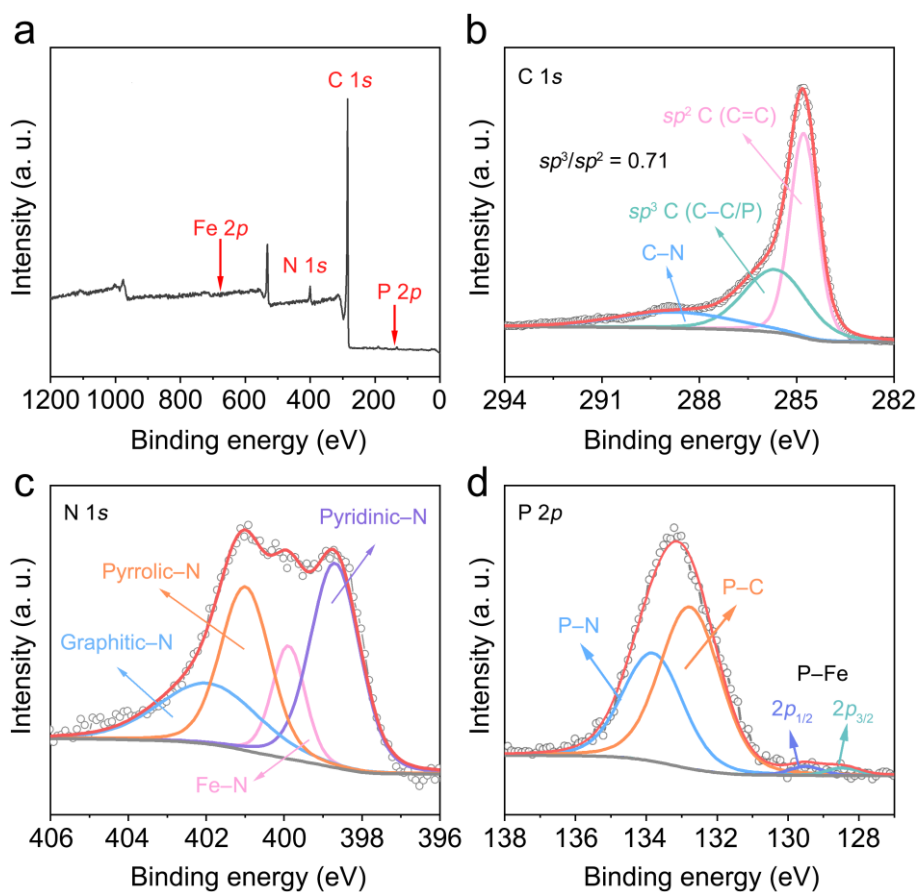

**Fig. S16.** XPS characterization of Fe<sub>2</sub>/NCP. (a) XPS survey scan, (b) C 1s, (c) N 1s and (d) P 2p spectra.

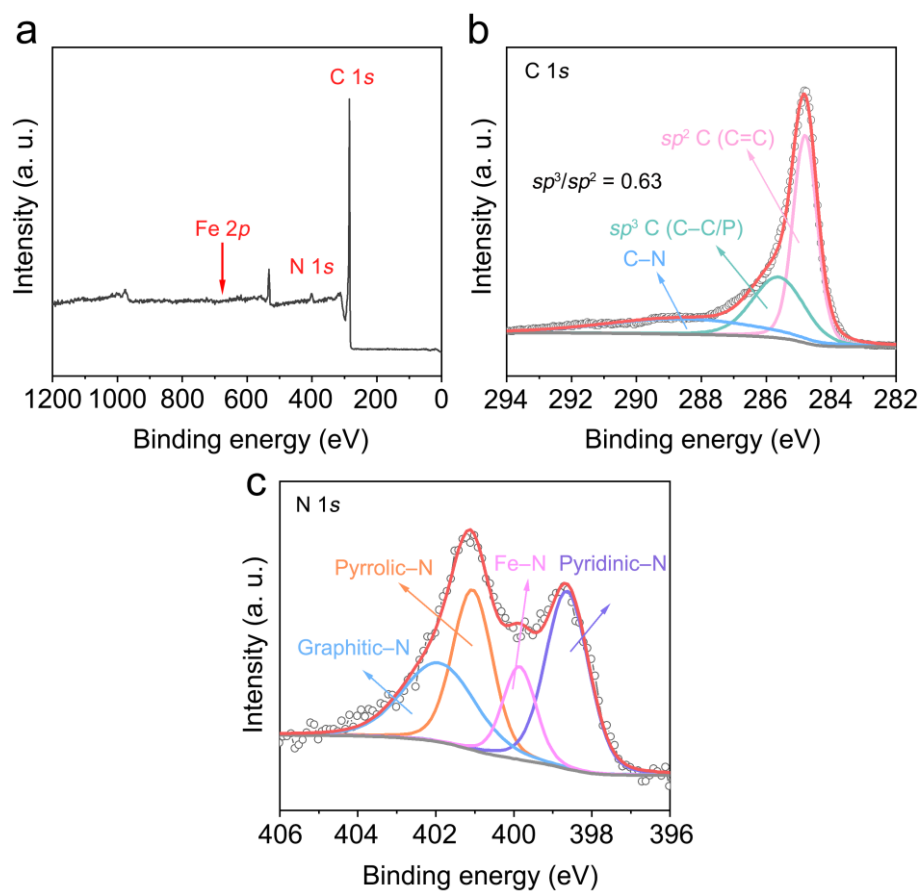

**Fig. S17.** XPS characterization of Fe<sub>2</sub>/NC. (a) XPS survey scan, (b) C 1s, and (c) N 1s spectra.

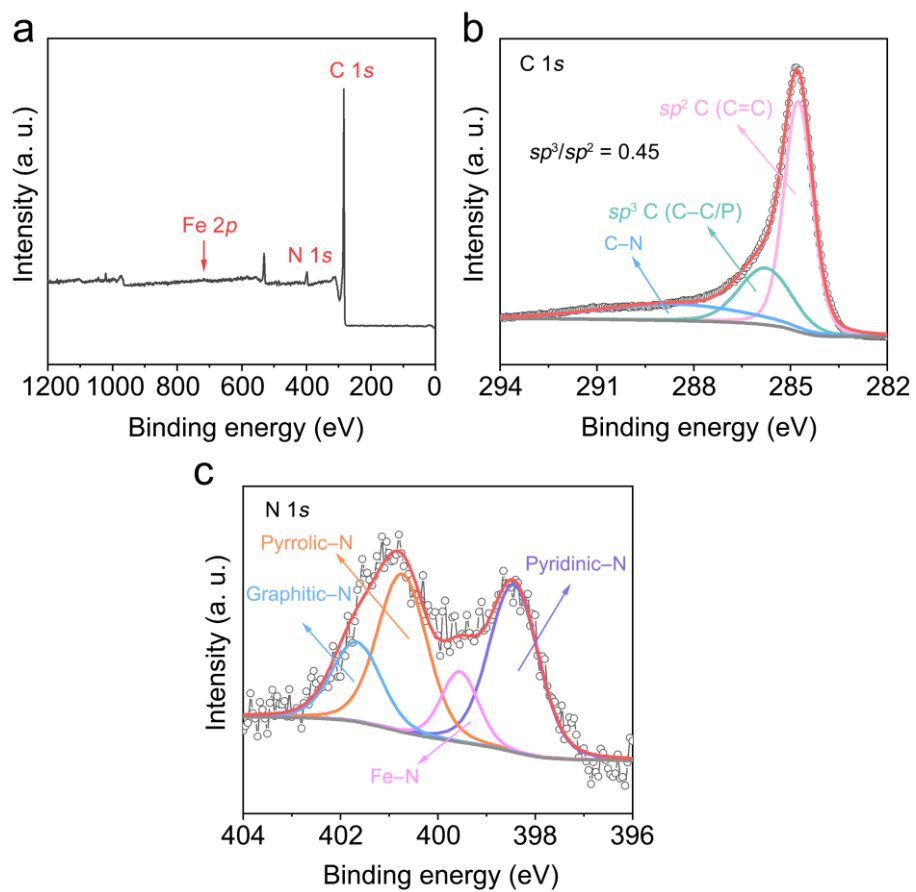

**Fig. S18.** XPS characterization of Fe<sub>1</sub>/NC. (a) XPS survey scan, (b) C 1s, and (c) N 1s spectra.

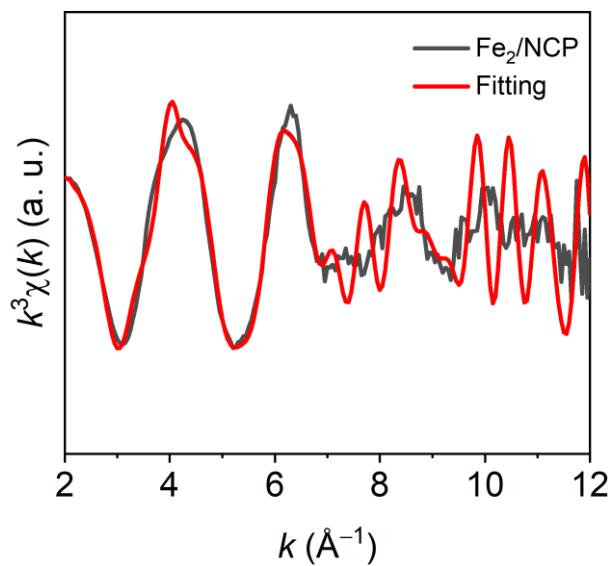

**Fig. S19.** FT-EXAFS fitting curve of Fe<sub>2</sub>/NCP in *k* space.

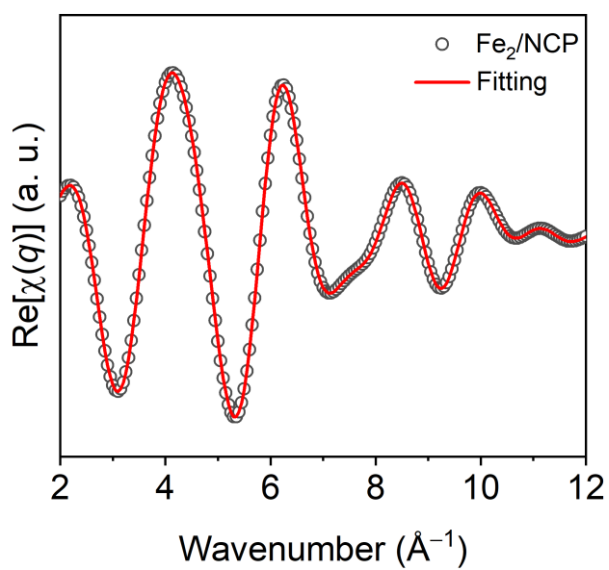

**Fig. S20.** FT-EXAFS fitting curve of Fe<sub>2</sub>/NCP in *q* space.

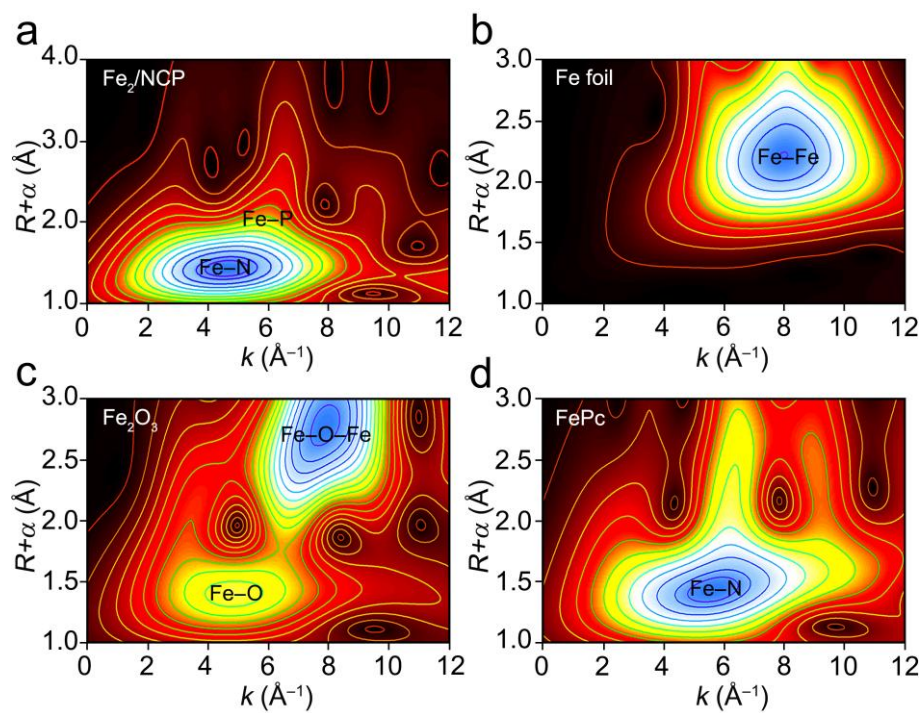

**Fig. S21.** Wavelet-transform of EXAFS spectra of (a) Fe<sub>2</sub>/NCP, (b) Fe foil, (c) Fe<sub>2</sub>O<sub>3</sub>, and (d) FePc.

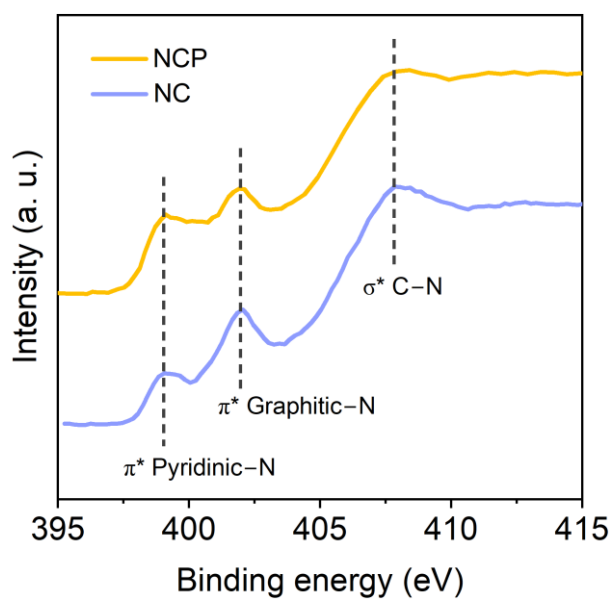

**Fig. S22.** N K-edge XANES spectra of NCP and NC.

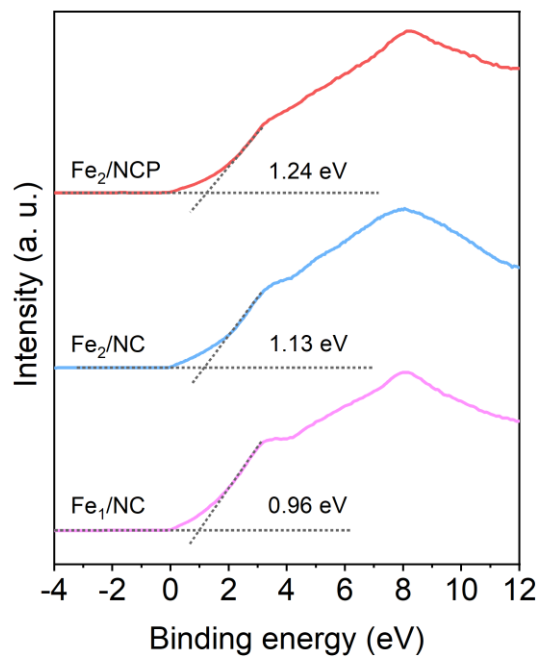

**Fig. S23.** UPS valence band spectra of Fe<sub>2</sub>/NCP, Fe<sub>2</sub>/NC, and Fe<sub>1</sub>/NC.

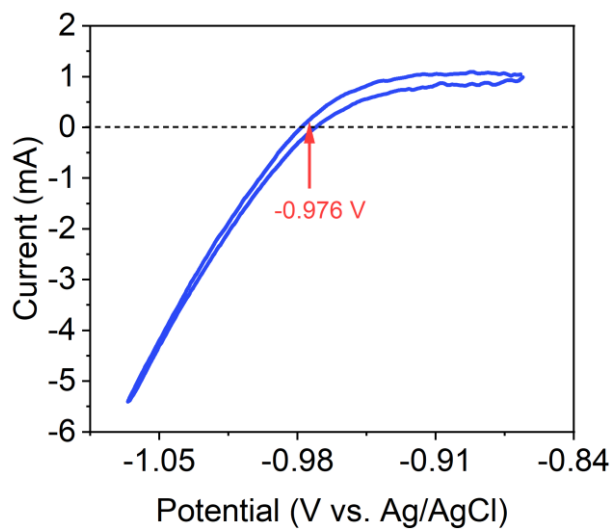

**Fig. S24.** The calibration curve of reference electrode in 0.1 M KOH.  $E$  (vs. RHE) =  $E$  (vs. Ag/AgCl) + 0.976 V.

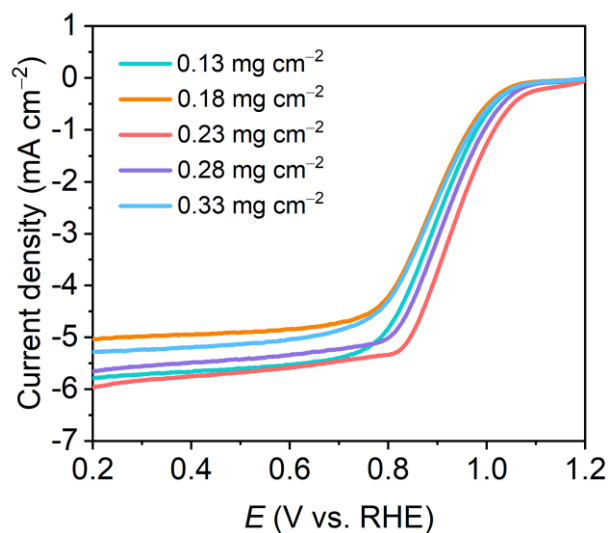

**Fig. S25.** ORR LSV curves of  $\text{Fe}_2/\text{NCP}$  with different loadings in 0.1 M KOH.

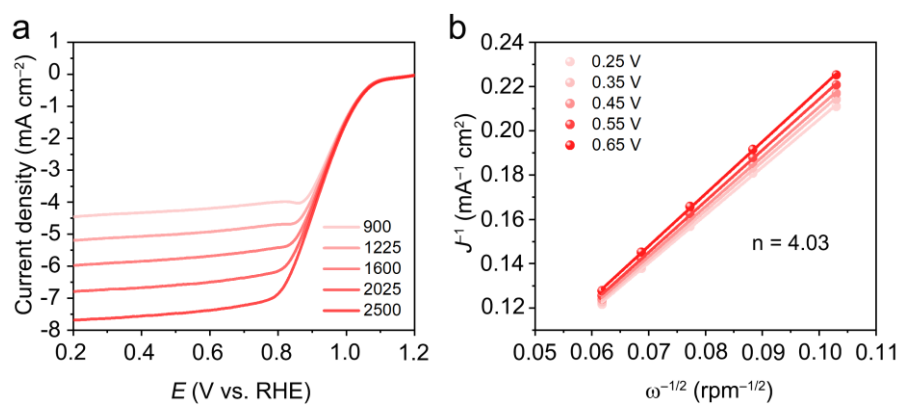

**Fig. S26.** (a) ORR LSV curves of  $\text{Fe}_2/\text{NCP}$  at different rotating speeds in 0.1 M KOH. (b) The corresponding K-L plots and electron-transfer number.

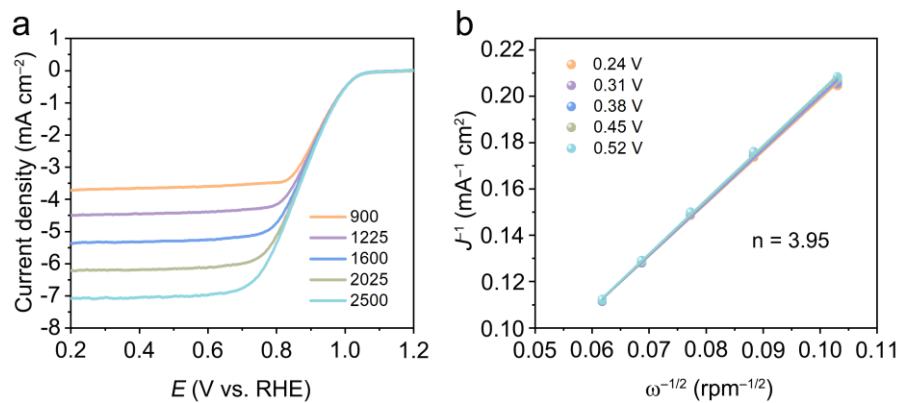

**Fig. S27** (a) ORR LSV curves of Fe<sub>2</sub>/NC at different rotating speeds in 0.1 M KOH. (b) The corresponding K-L plots and electron-transfer number.

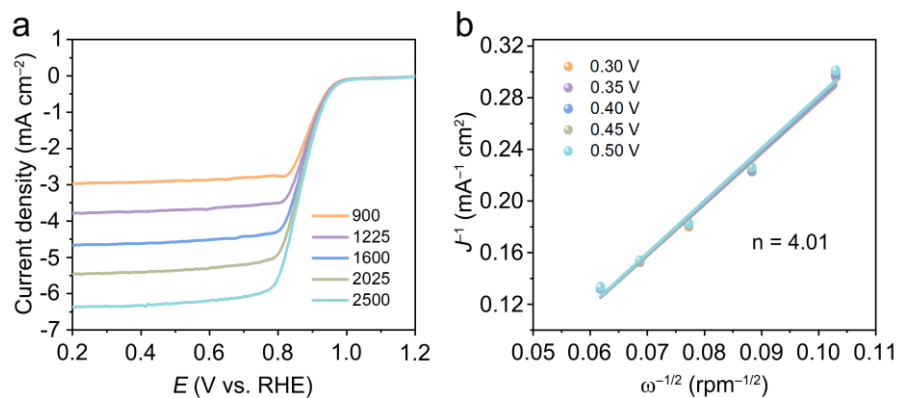

**Fig. S28.** (a) ORR LSV curves of Fe<sub>1</sub>/NC at different rotating speeds in 0.1 M KOH. (b) The corresponding K-L plots and electron-transfer number.

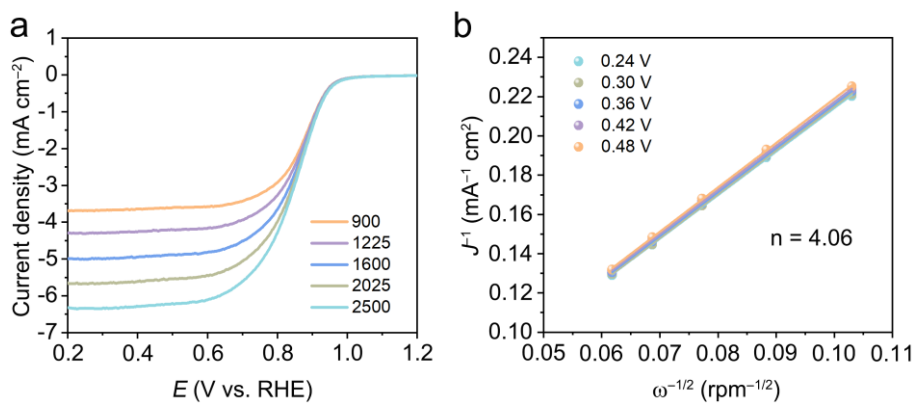

**Fig. S29.** (a) ORR LSV curves of Pt/C at different rotating speeds in 0.1 M KOH. (b) The corresponding K-L plots and electron-transfer number.

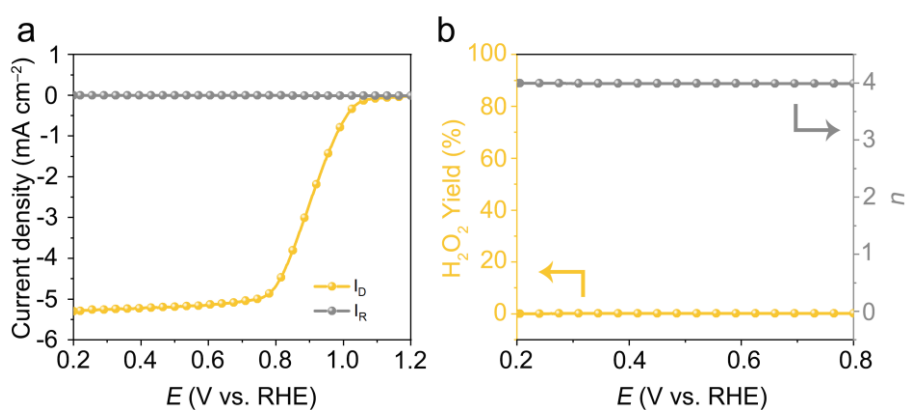

**Fig. S30.** (a) RRDE measurements and (b) the corresponding electron transfer number and H<sub>2</sub>O<sub>2</sub> yield of Fe<sub>2</sub>/NC in 0.1 M KOH.

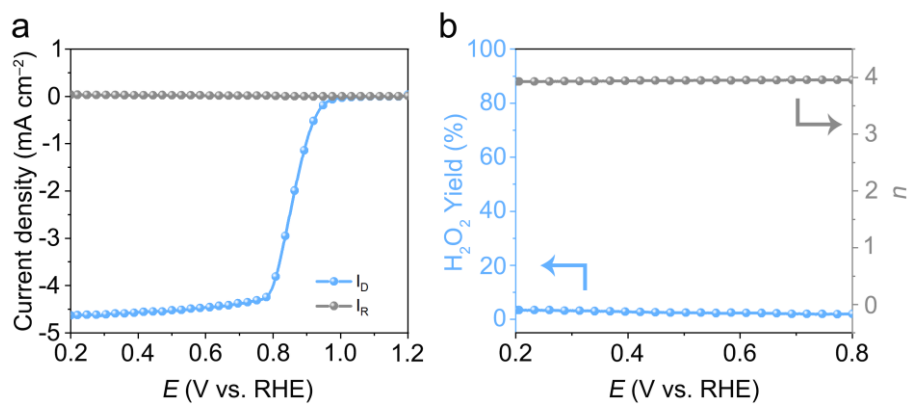

**Fig. S31.** (a) RRDE measurements and (b) the corresponding electron transfer number and H<sub>2</sub>O<sub>2</sub> yield of Fe<sub>1</sub>/NC in 0.1 M KOH.

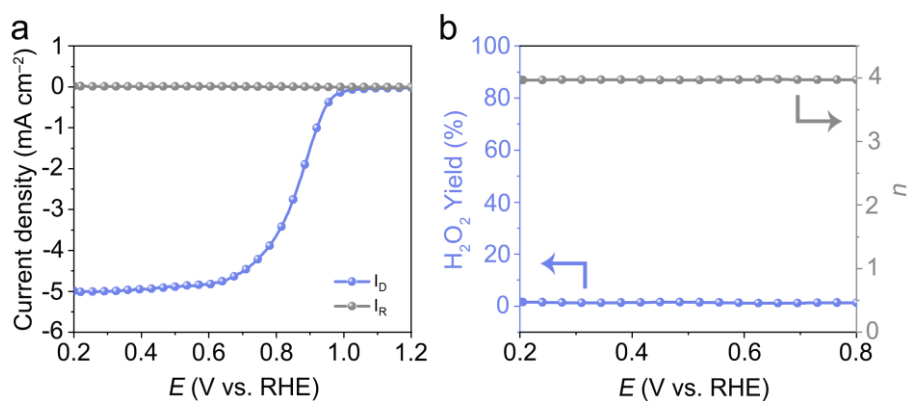

**Fig. S32.** (a) RRDE measurements and (b) the corresponding electron transfer number and H<sub>2</sub>O<sub>2</sub> yield of Pt/C in 0.1 M KOH.

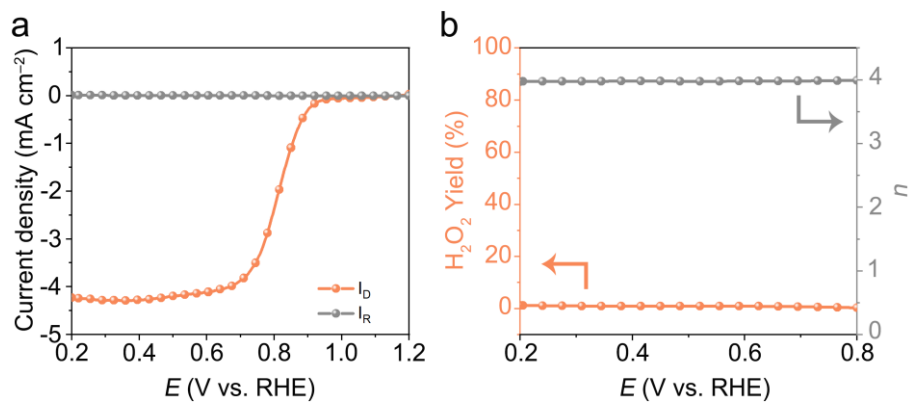

**Fig. S33.** (a) RRDE measurements and (b) the corresponding electron transfer number and H<sub>2</sub>O<sub>2</sub> yield of NCP in 0.1 M KOH.

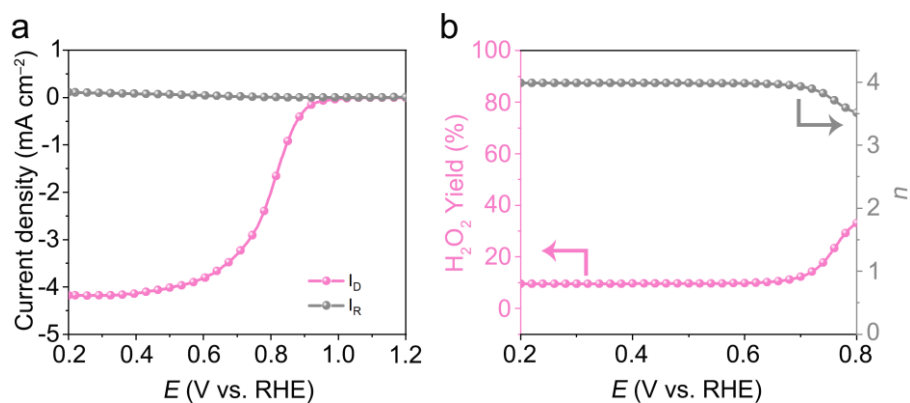

**Fig. S34.** (a) RRDE measurements and (b) the corresponding electron transfer number and H<sub>2</sub>O<sub>2</sub> yield of NC in 0.1 M KOH.

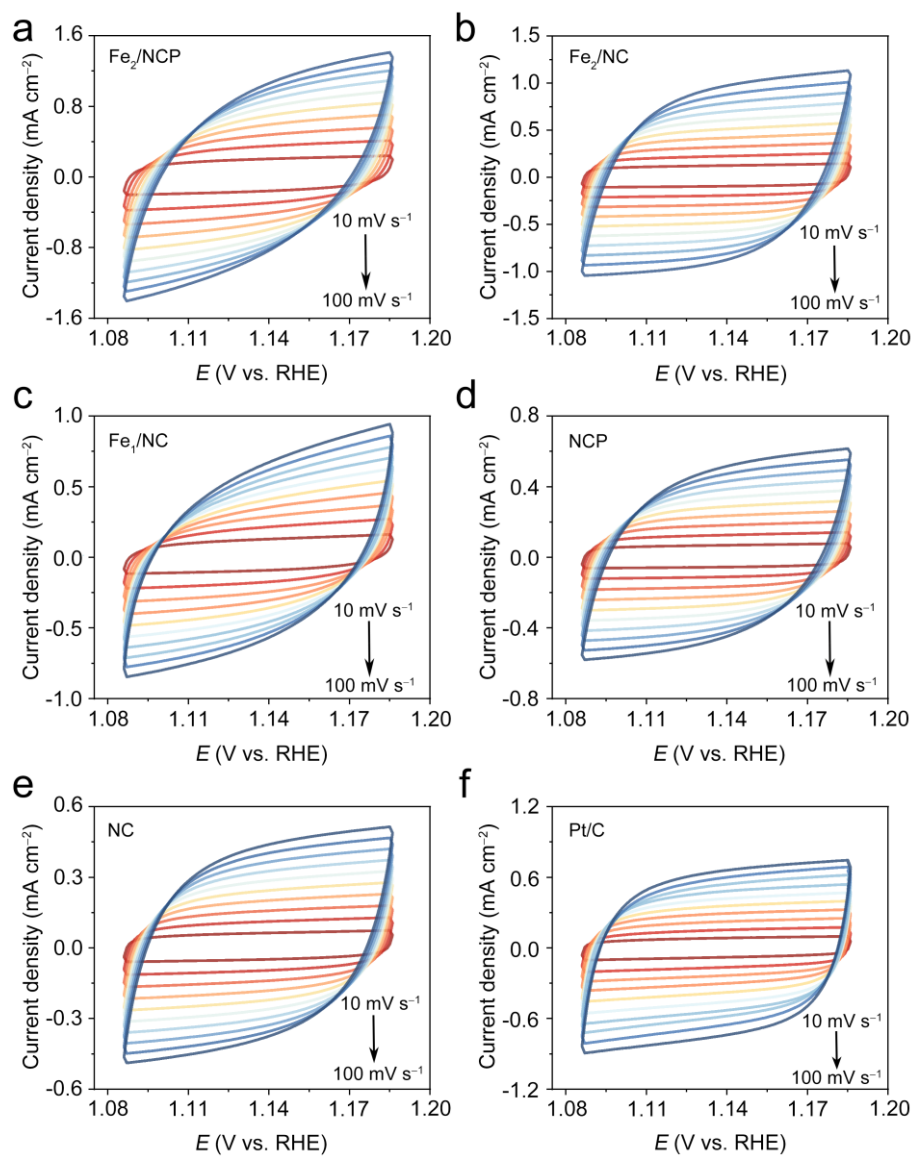

**Fig. S35.** CV curves of (a) Fe<sub>2</sub>/NCP, (b) Fe<sub>2</sub>/NC, (c) Fe<sub>1</sub>/NC, (d) NCP, (e) NC, and (f) 20 wt% Pt/C in 0.1 M KOH.

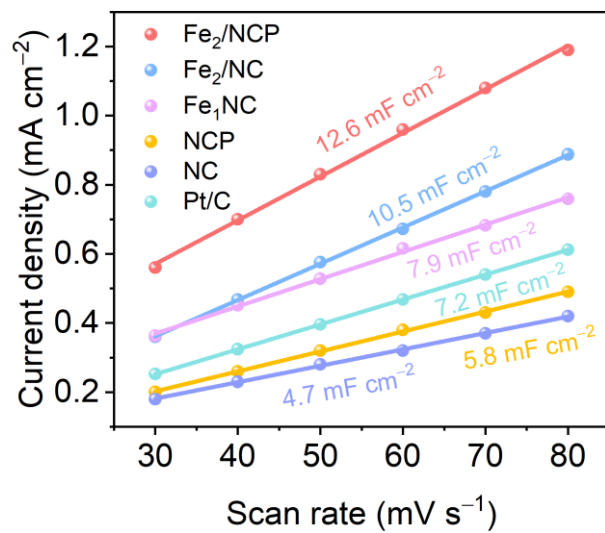

**Fig. S36.** The calculated C<sub>dl</sub> values.

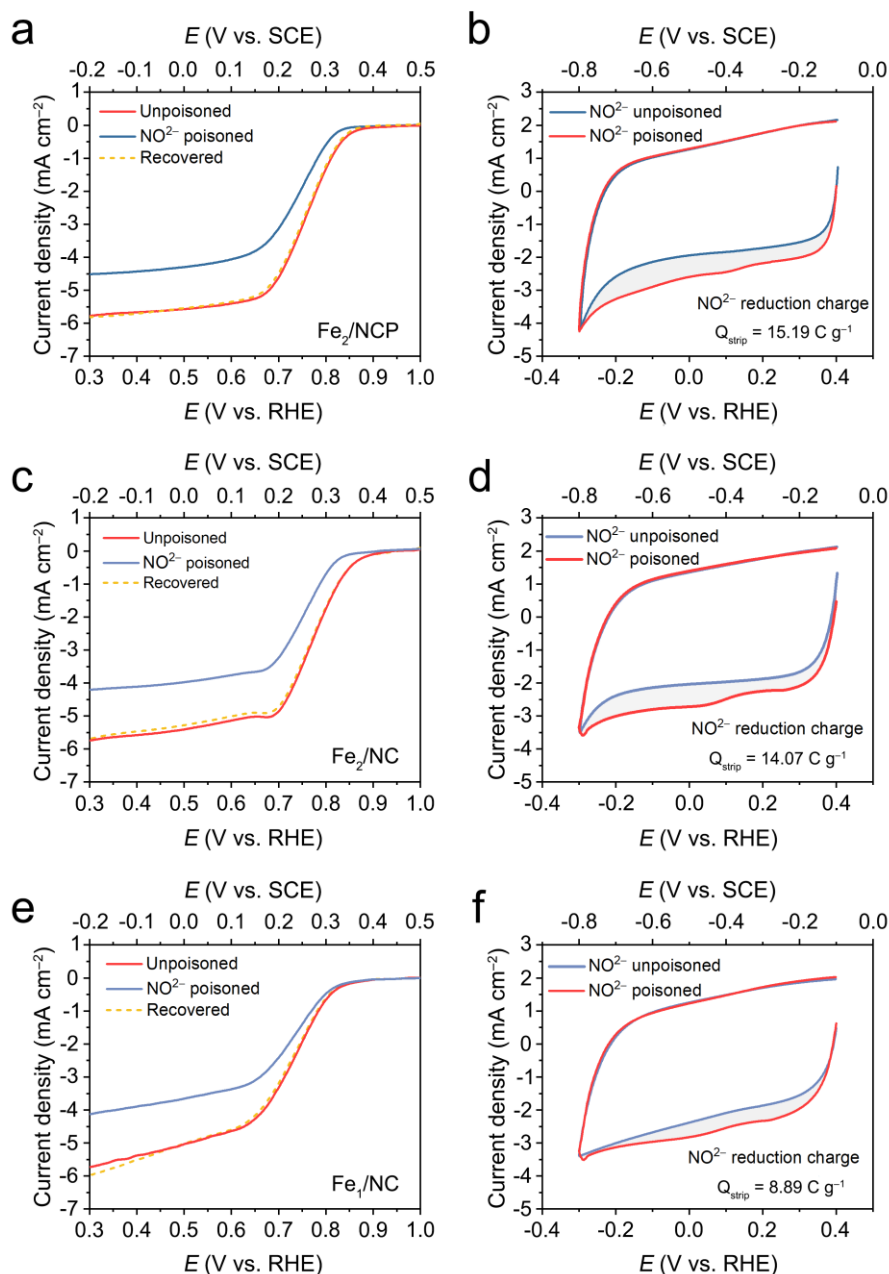

**Fig. S37.** Determination of site density of Fe<sub>2</sub>/NCP, Fe<sub>2</sub>/NC, and Fe<sub>1</sub>/NC by reversible nitrite poisoning. (a,c,e) LSV curves before, during, and after nitrite adsorption. (b,d,f) CV curves before and during nitrite adsorption in the nitrite reductive stripping region. 0.5 M acetate buffer at pH 5.2. Catalyst loading: 0.27 mg cm<sup>-2</sup>.

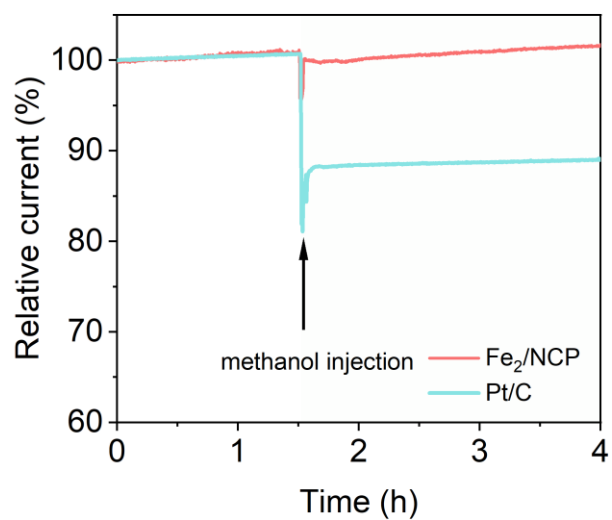

**Fig. S38.** Methanol tolerance evaluation in 0.1 M KOH.

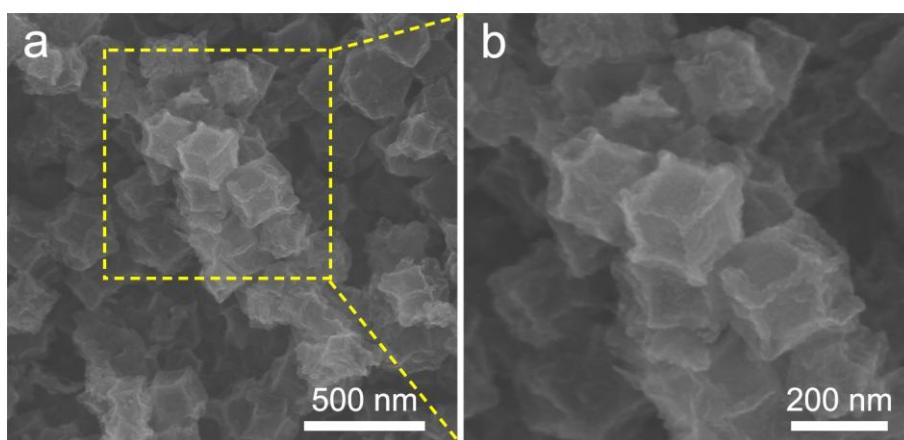

**Fig. S39.** (a) SEM image and (b) the corresponding enlarged image of Fe<sub>2</sub>/NCP after 40000 potential cycles in 0.1 M KOH.

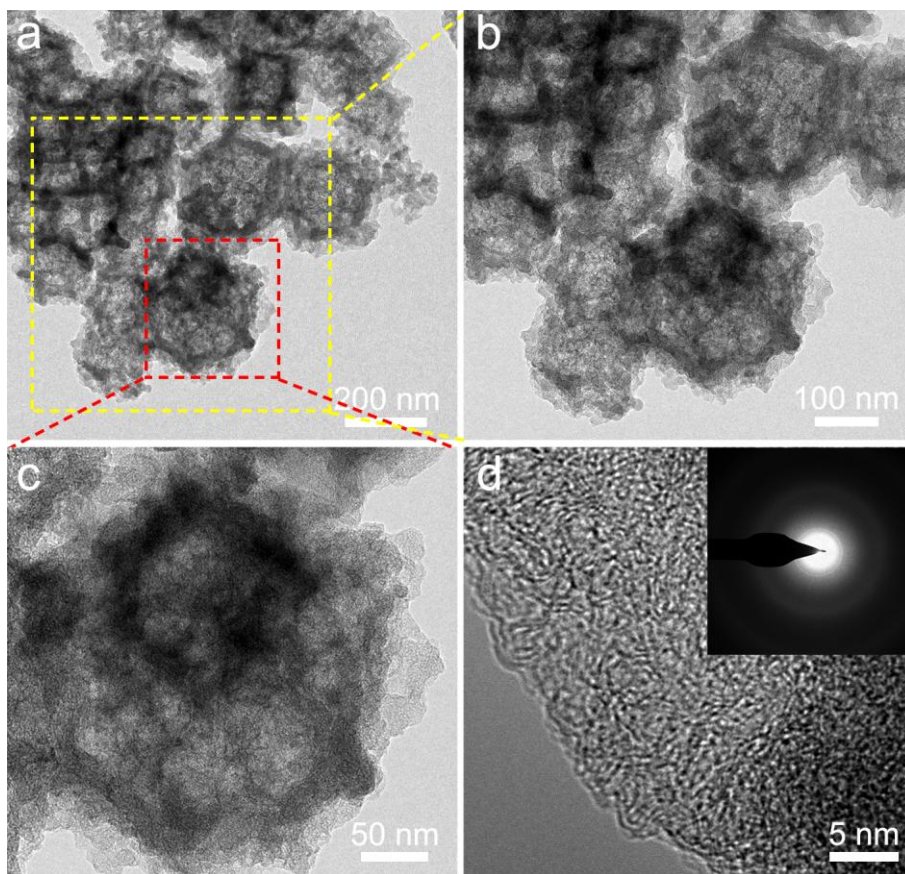

**Fig. S40.** Morphology characterization of Fe<sub>2</sub>/NCP after 40000 potential cycles in 0.1 M KOH. (a) TEM image and (b, c) the corresponding enlarged images. (d) HR-TEM image and SAED pattern.

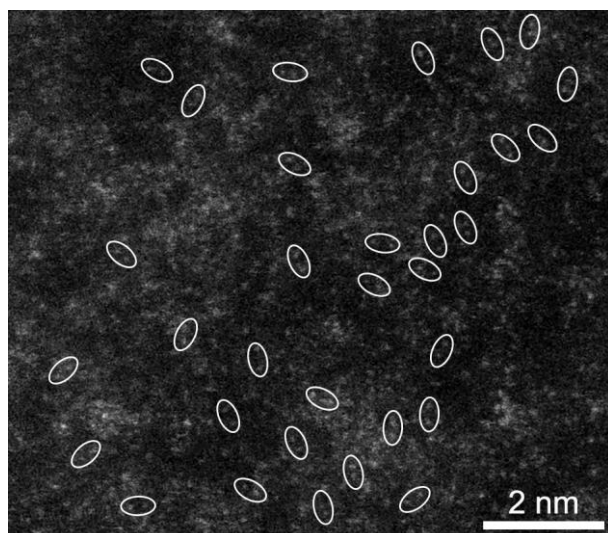

**Fig. S41.** AC HAADF-STEM image of Fe<sub>2</sub>/NCP after 40000 potential cycles in 0.1 M KOH.

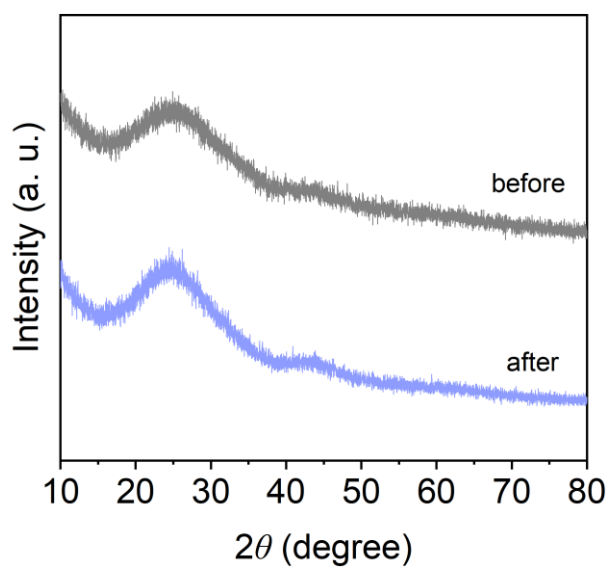

**Fig. S42.** XRD patterns of Fe<sub>2</sub>/NCP before and after 40000 potential cycles in 0.1 M KOH.

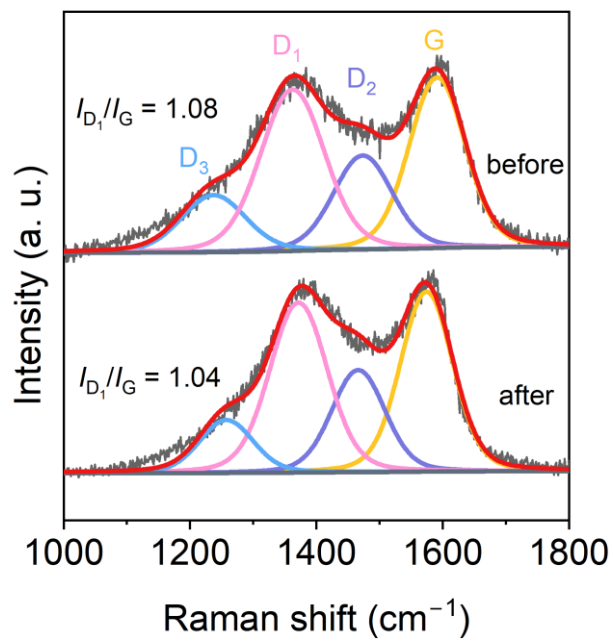

**Fig. S43.** Raman spectra of Fe<sub>2</sub>/NCP before and after 40000 potential cycles in 0.1 M KOH.

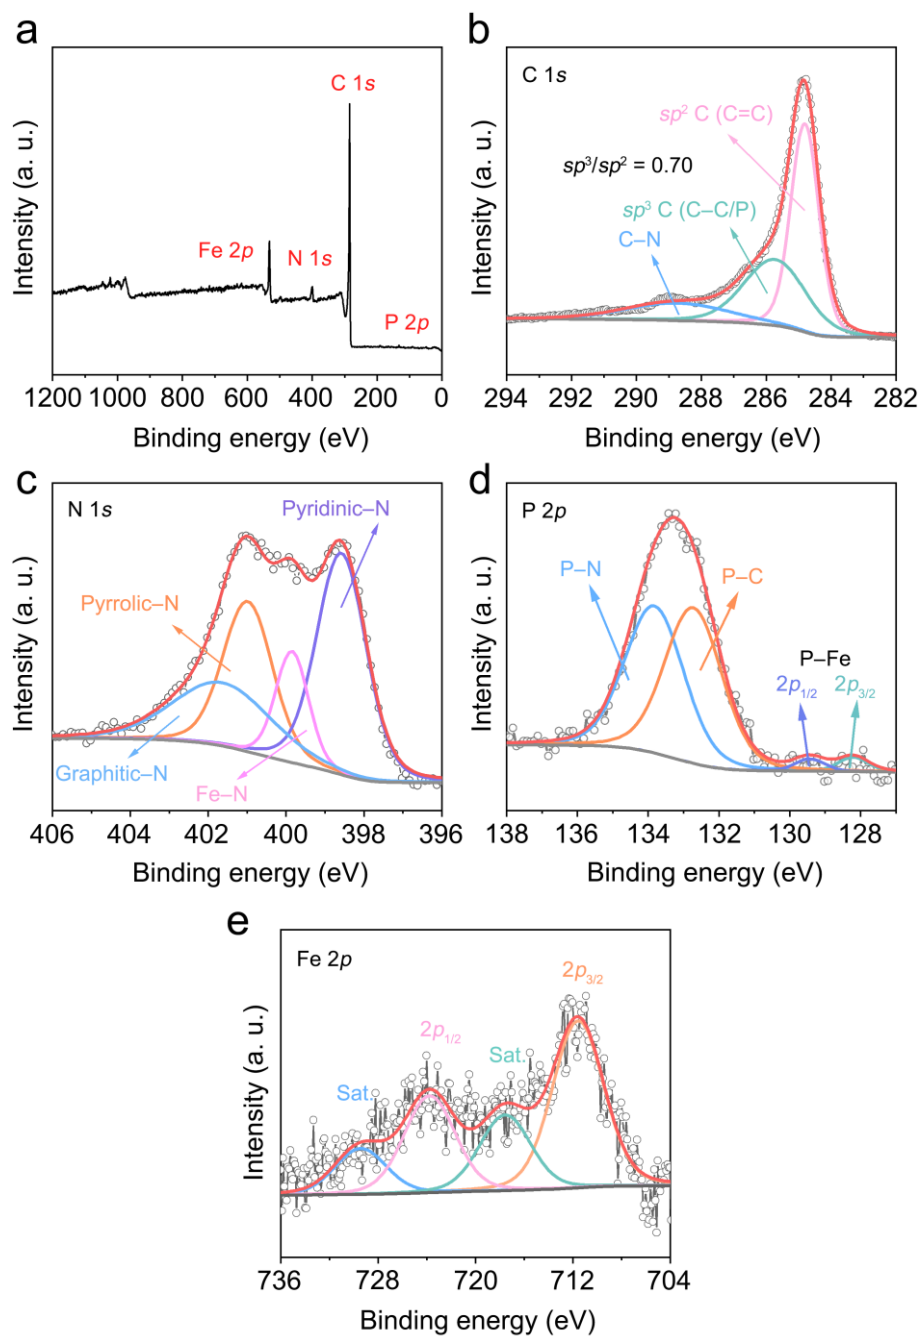

**Fig. S44.** XPS characterization of Fe<sub>2</sub>/NCP after 40000 potential cycles in 0.1 M KOH. (a) XPS survey scan, (b) C 1s, (c) N 1s, (d) P 2p, and (e) Fe 2p spectra.

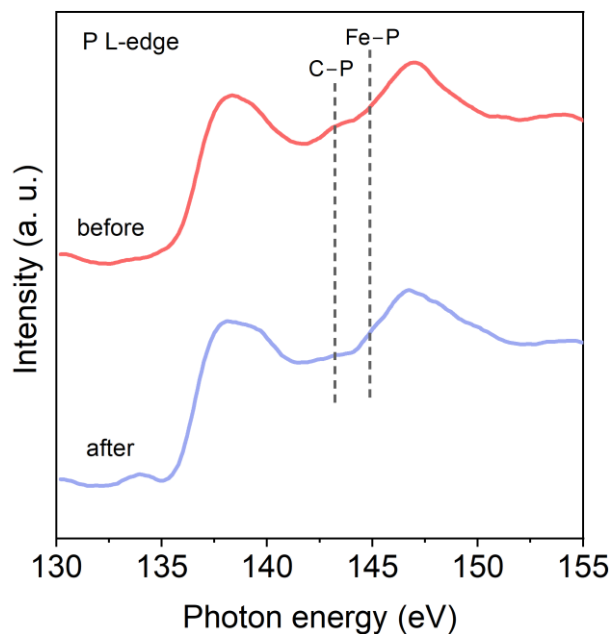

**Fig. S45.** P L-edge XANES spectra of  $\text{Fe}_2/\text{NCP}$  before and after 40000 potential cycles in 0.1 M KOH.

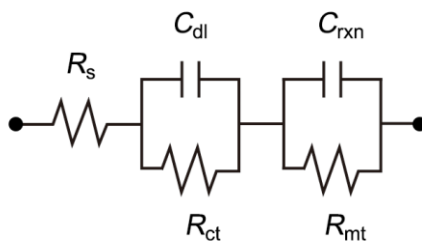

**Fig. S46.** The equivalent circuit fitting model. The fitting elements were assigned to the solution resistance ( $R_s$ ), double-layer capacitance of catalyst layer ( $C_{dl}$ ), the charge transfer resistance ( $R_{ct}$ ), mass-transfer resistance ( $R_{mt}$ ) and capacitance of reaction process ( $C_{rxn}$ ).

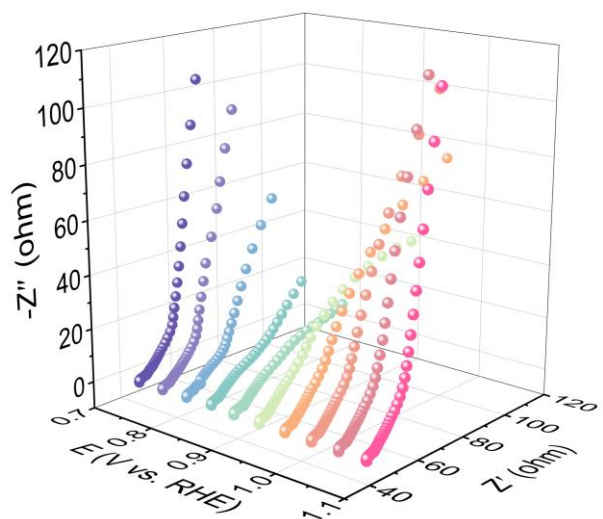

**Fig. S47.** In situ EIS results of Fe<sub>2</sub>/NC in 0.1 M KOH.

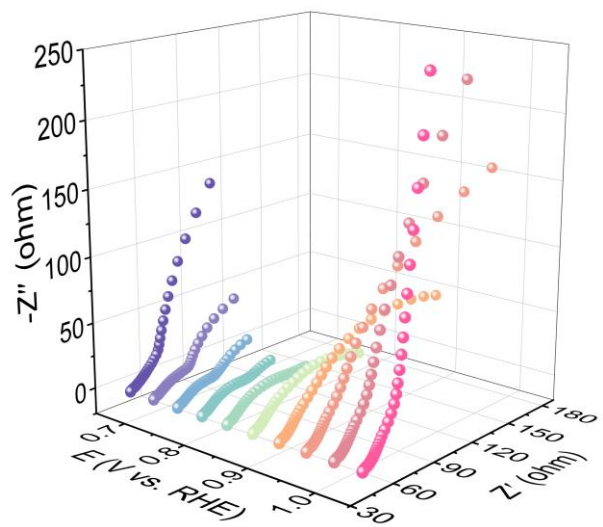

**Fig. S48.** In situ EIS results of Fe<sub>1</sub>/NC in 0.1 M KOH.

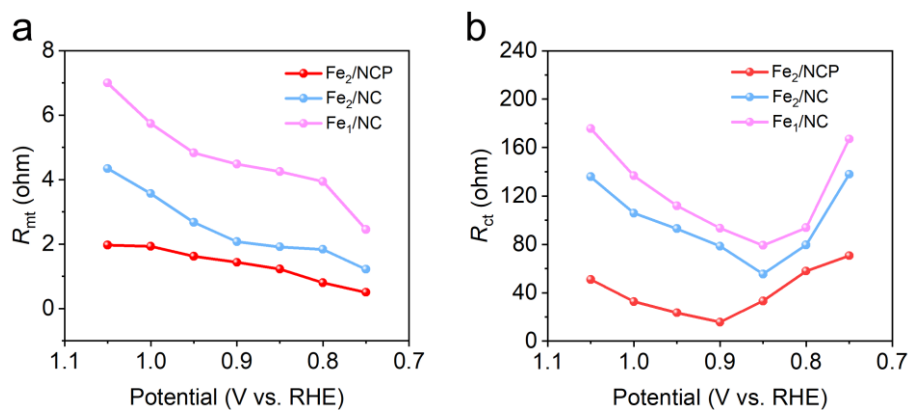

**Fig. S49.** Comparison of (a)  $R_{mt}$  and (b)  $R_{ct}$  at different potentials of  $Fe_2/NCP$ ,  $Fe_2/NC$ , and  $Fe_1/NC$  in 0.1 M KOH.

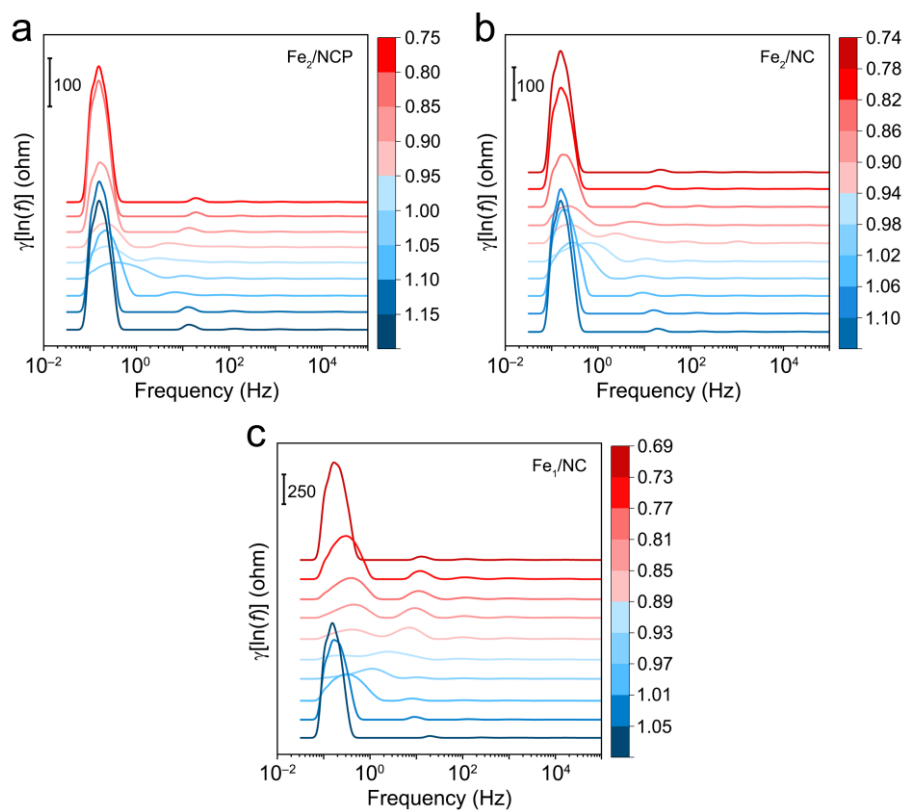

**Fig. S50.** DRT plots of (a)  $Fe_2/NCP$ , (b)  $Fe_2/NC$ , and (c)  $Fe_1/NC$  obtained by deconvolving the in situ EIS measurement in 0.1 M KOH.

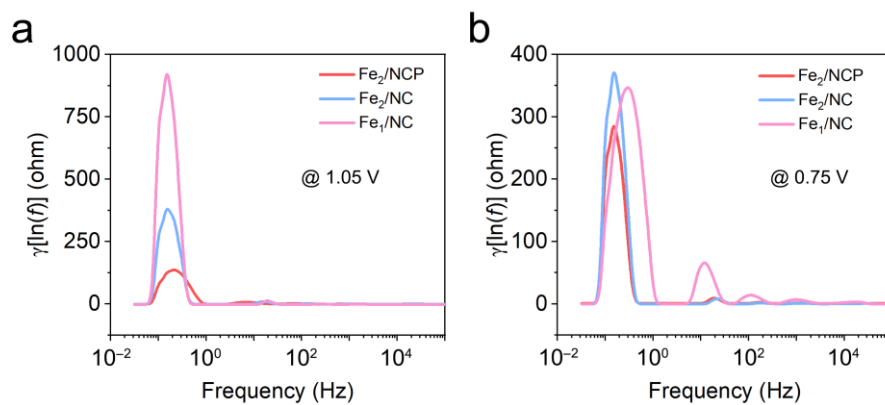

**Fig. S51.** The DRT analysis of Fe<sub>2</sub>/NCP, Fe<sub>2</sub>/NC, and Fe<sub>1</sub>/NC at (a) 1.05 V and (b) 0.75 V in 0.1 M KOH.

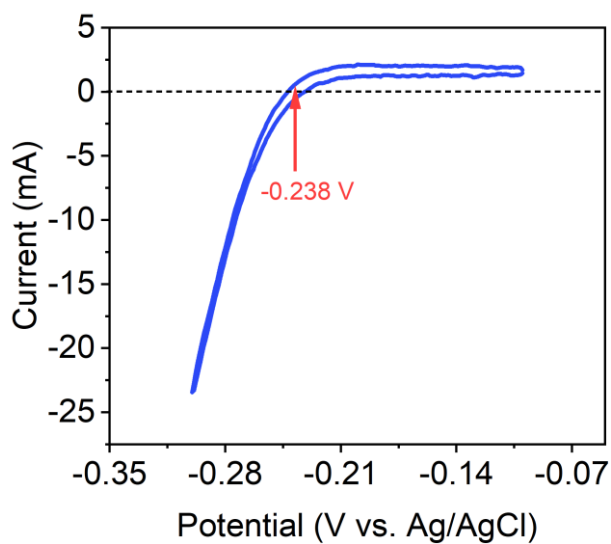

**Fig. S52.** The calibration curve of reference electrode in 0.5 M H<sub>2</sub>SO<sub>4</sub>.  $E$  (vs. RHE) =  $E$  (vs. Ag/AgCl) + 0.238 V.

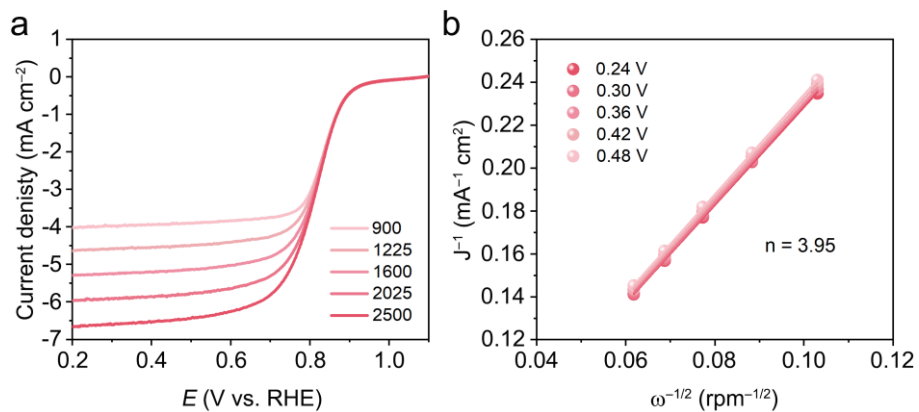

**Fig. S53.** (a) ORR LSV curves of Fe<sub>2</sub>/NCP at different rotating speeds in 0.5 M H<sub>2</sub>SO<sub>4</sub>. (b) The corresponding K-L plots and electron-transfer number.

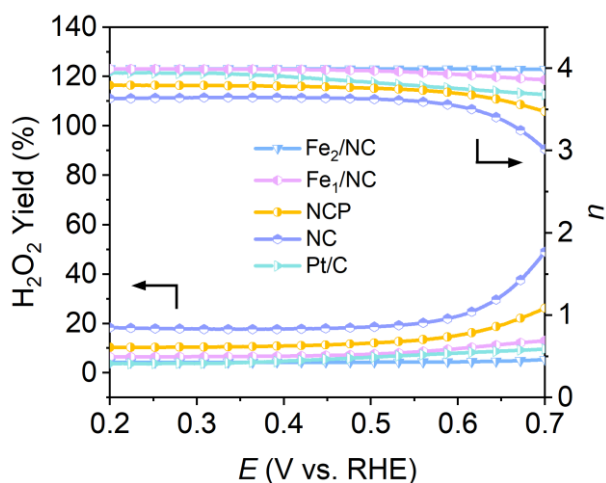

**Fig. S54.** Electron transfer number and H<sub>2</sub>O<sub>2</sub> yield of Fe<sub>2</sub>/NC, Fe<sub>1</sub>/NC, Pt/C, NCP, and NC in 0.5 M H<sub>2</sub>SO<sub>4</sub>.

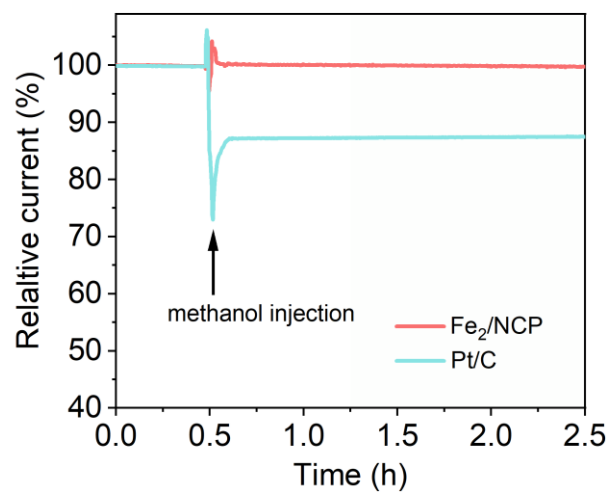

**Fig. S55.** Methanol tolerance evaluation in 0.5 M H<sub>2</sub>SO<sub>4</sub>.

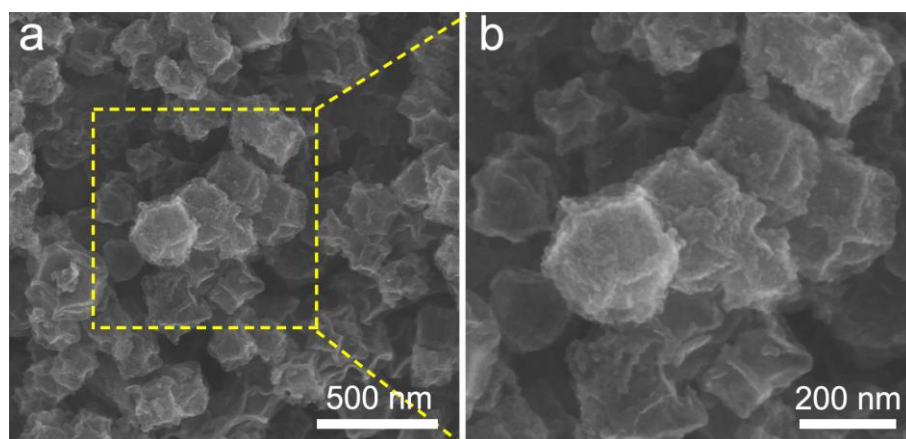

**Fig. S56.** (a) SEM image and (b) the enlarged image of Fe<sub>2</sub>/NCP after 40000 potential cycles in 0.5 M H<sub>2</sub>SO<sub>4</sub>.

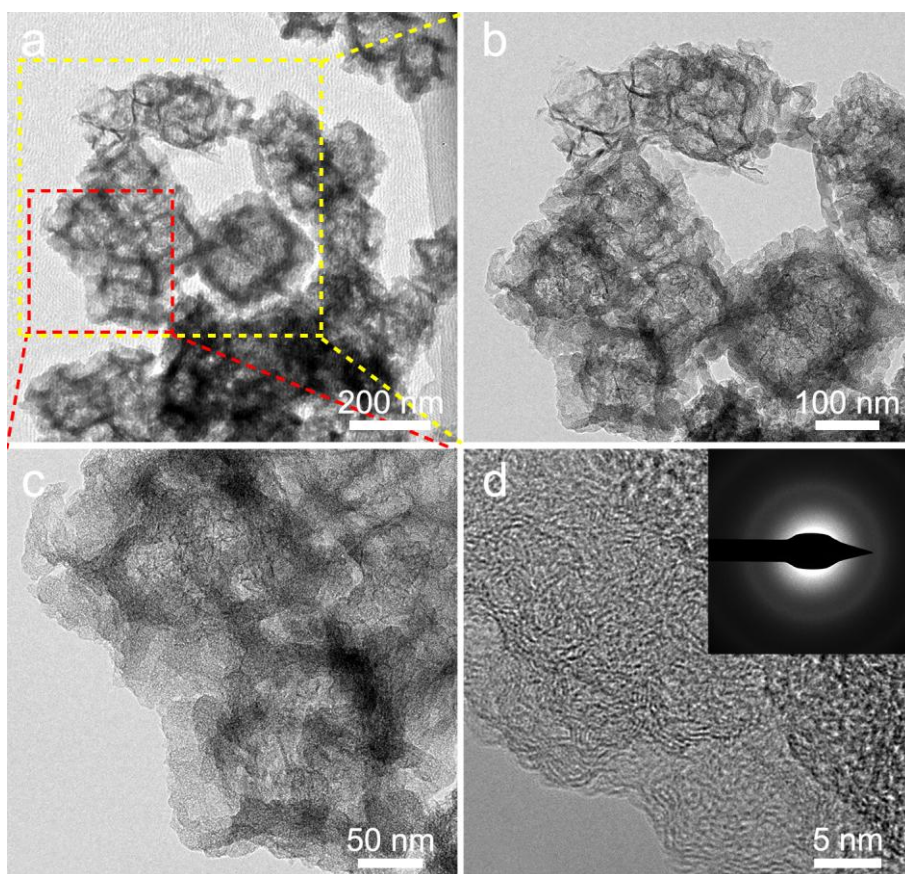

**Fig. S57.** Morphology characterization of Fe<sub>2</sub>/NCP after 40000 potential cycles in 0.5 M H<sub>2</sub>SO<sub>4</sub>. (a) TEM image and (b, c) the corresponding enlarged images. (d) HR-TEM image and SAED pattern.

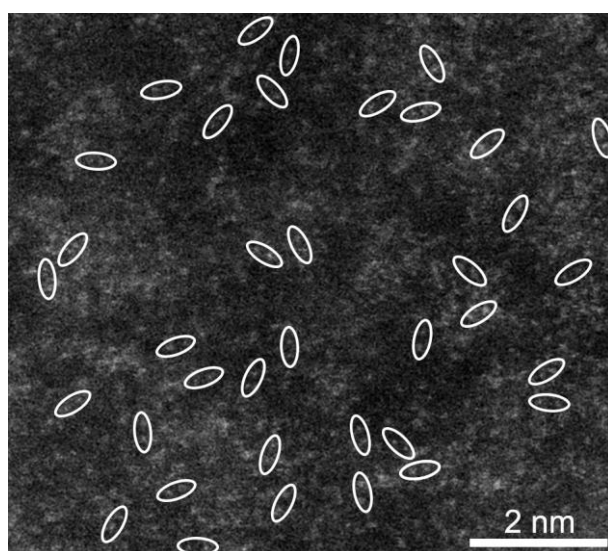

**Fig. S58.** AC HAADF-STEM image of Fe<sub>2</sub>/NCP after 40000 potential cycles in 0.5 M H<sub>2</sub>SO<sub>4</sub>.

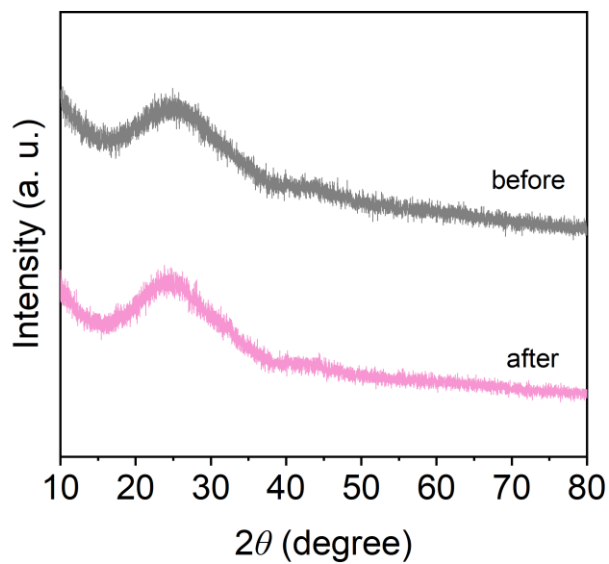

**Fig. S59.** XRD patterns of Fe<sub>2</sub>/NCP before and after 40000 potential cycles in 0.5 M H<sub>2</sub>SO<sub>4</sub>.

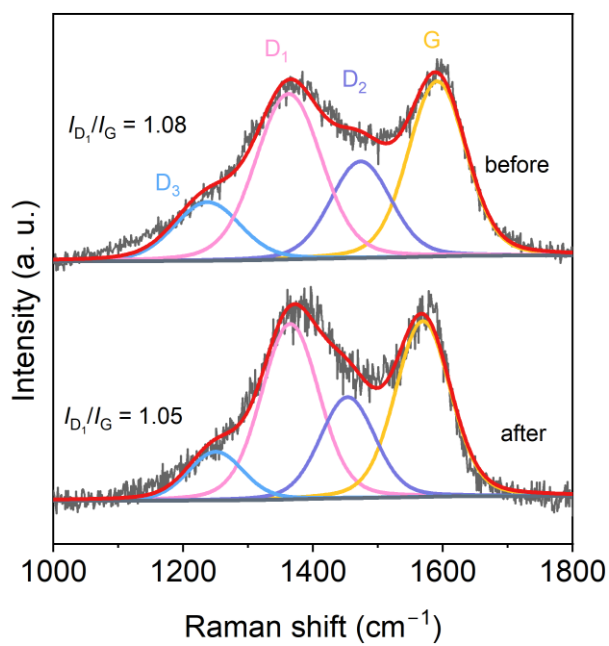

**Fig. S60.** Raman spectra of Fe<sub>2</sub>/NCP before and after 40000 potential cycles in 0.5 M H<sub>2</sub>SO<sub>4</sub>.

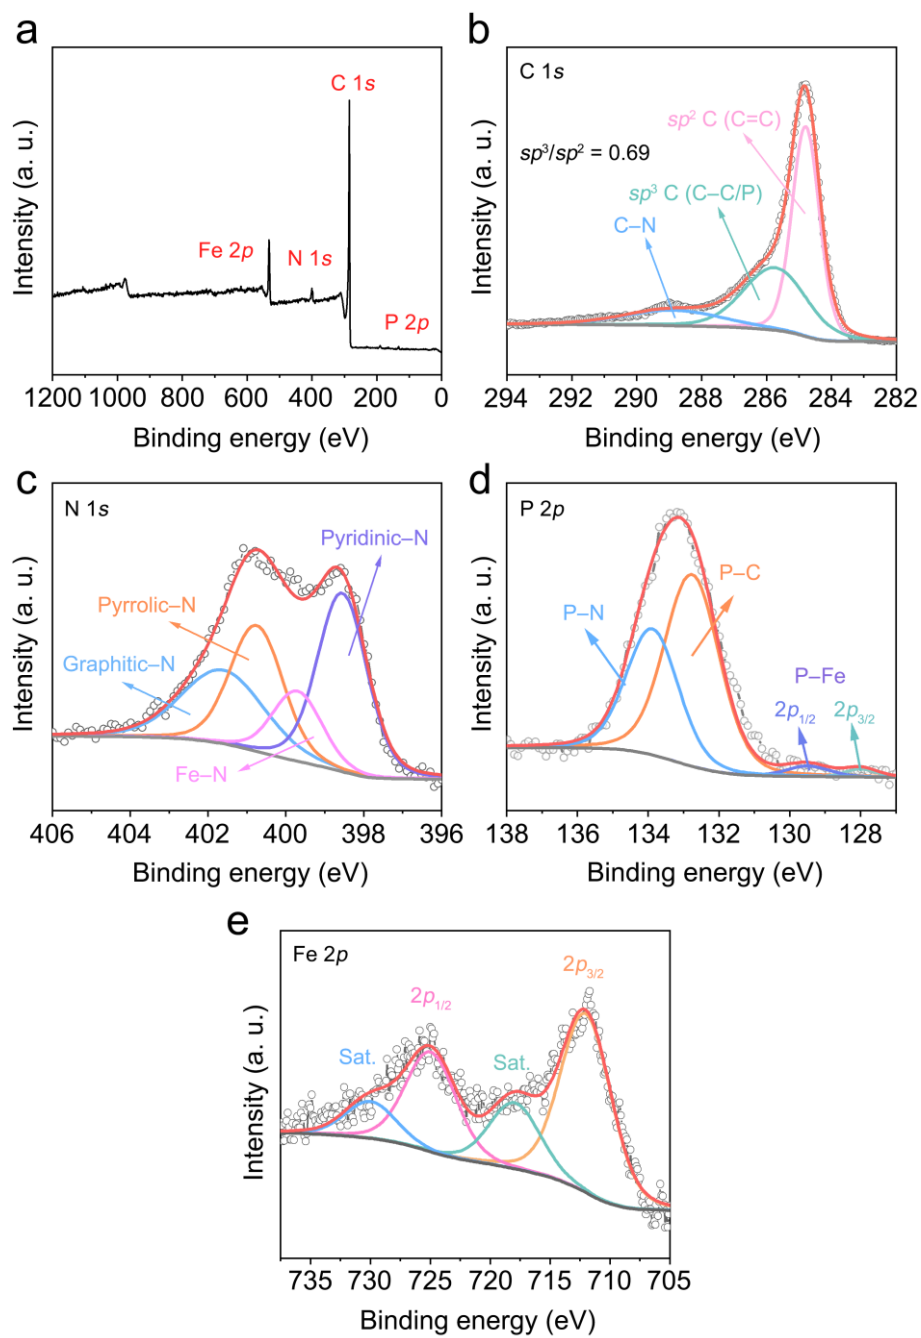

**Fig. S61.** XPS characterization of Fe<sub>2</sub>/NCP after 40000 potential cycles in 0.5 M H<sub>2</sub>SO<sub>4</sub>. (a) XPS survey scan, (b) C 1s, (c) N 1s, (d) P 2p, and (e) Fe 2p spectra.

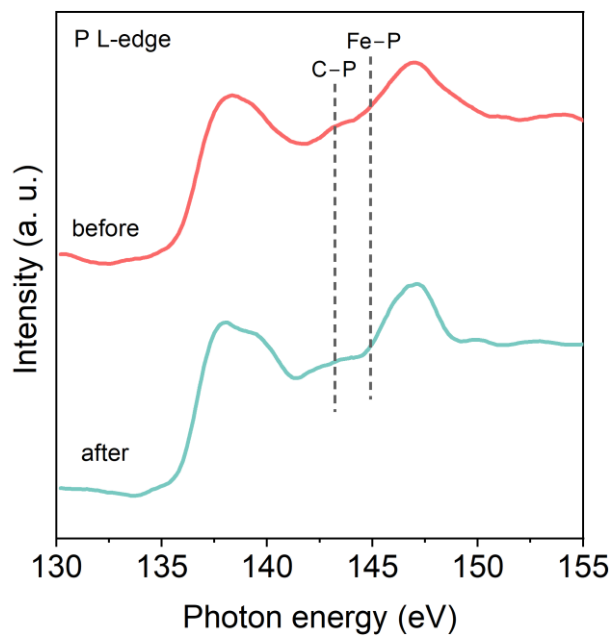

**Fig. S62.** P L-edge XANES spectra of  $\text{Fe}_2/\text{NCP}$  before and after 40000 potential cycles in 0.5 M  $\text{H}_2\text{SO}_4$ .

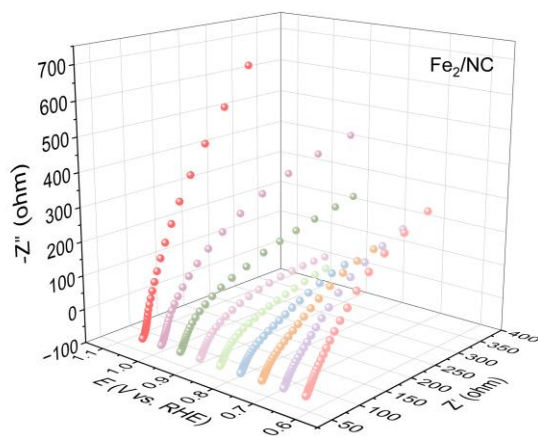

**Fig. S63.** In situ EIS results of  $\text{Fe}_2/\text{NC}$  in 0.5 M  $\text{H}_2\text{SO}_4$ .

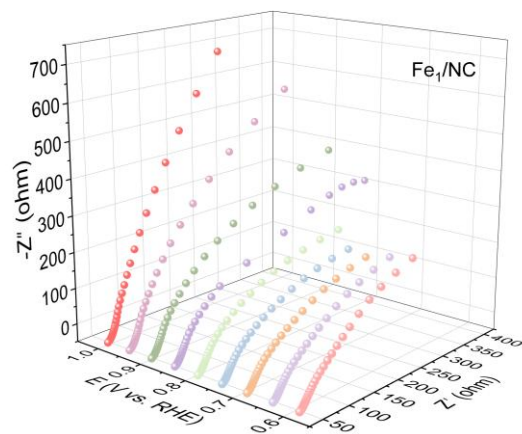

**Fig. S64.** In situ EIS results of Fe<sub>1</sub>/NC in 0.5 M H<sub>2</sub>SO<sub>4</sub>.

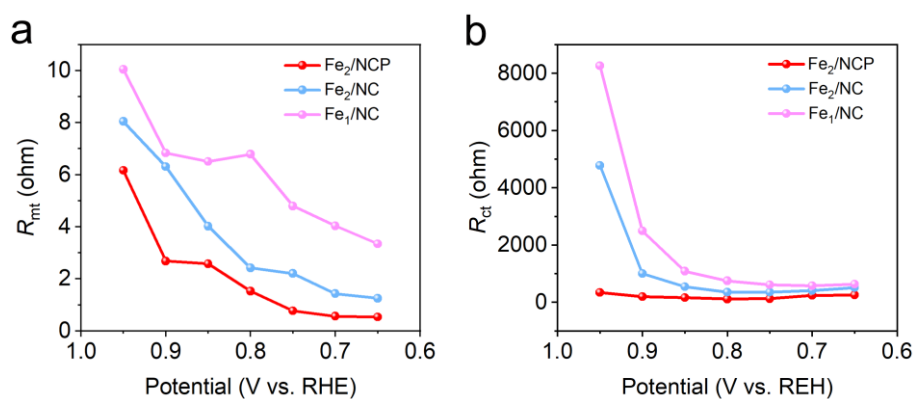

**Fig. S65.** Comparison of (a)  $R_{mt}$  and (b)  $R_{ct}$  at different potentials of Fe<sub>2</sub>/NCP, Fe<sub>2</sub>/NC, and Fe<sub>1</sub>/NC in 0.5 M H<sub>2</sub>SO<sub>4</sub>.

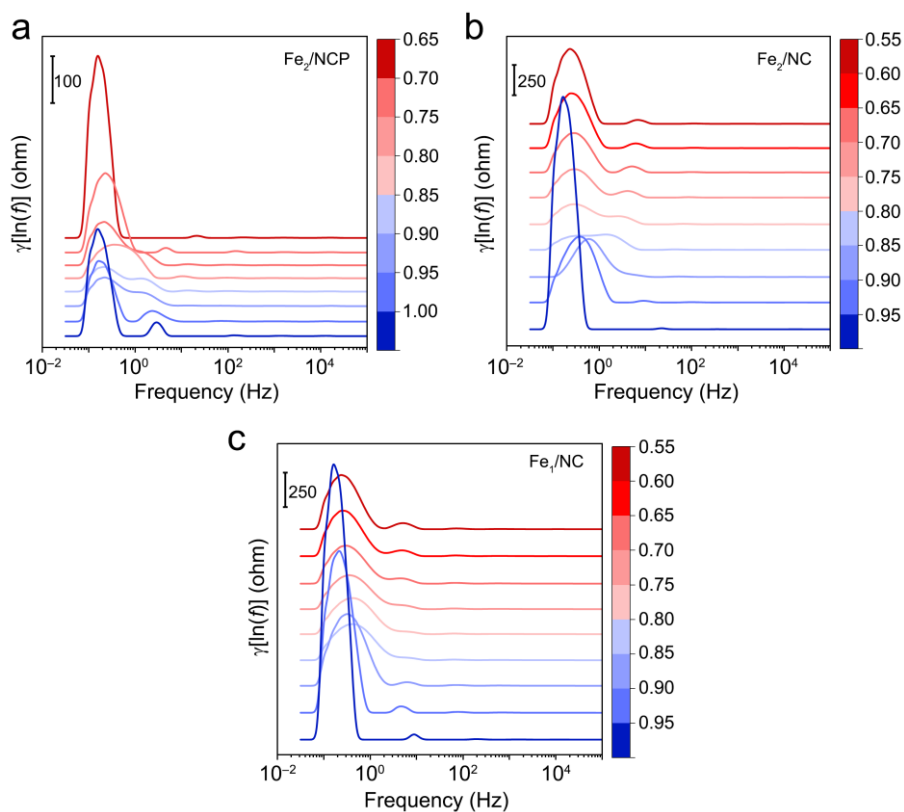

**Fig. S66.** DRT plots of (a)  $\text{Fe}_2/\text{NCP}$ , (b)  $\text{Fe}_2/\text{NC}$ , and (c)  $\text{Fe}_1/\text{NC}$  obtained by deconvolving the in situ EIS measurement in 0.5 M  $\text{H}_2\text{SO}_4$ .

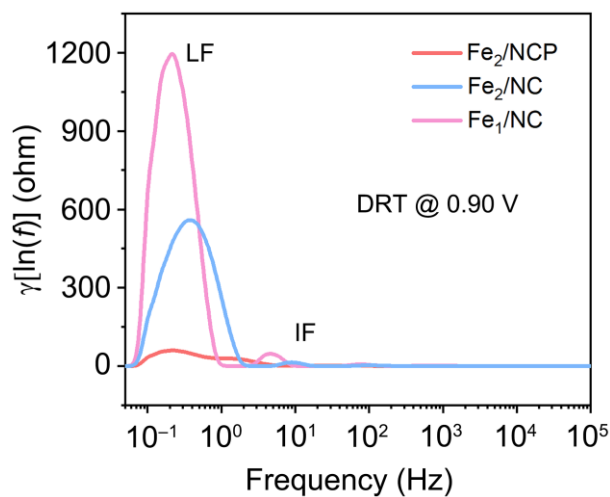

**Fig. S67.** The DRT analysis of  $\text{Fe}_2/\text{NCP}$ ,  $\text{Fe}_2/\text{NC}$ , and  $\text{Fe}_1/\text{NC}$  at 0.90 V in 0.5 M  $\text{H}_2\text{SO}_4$ .

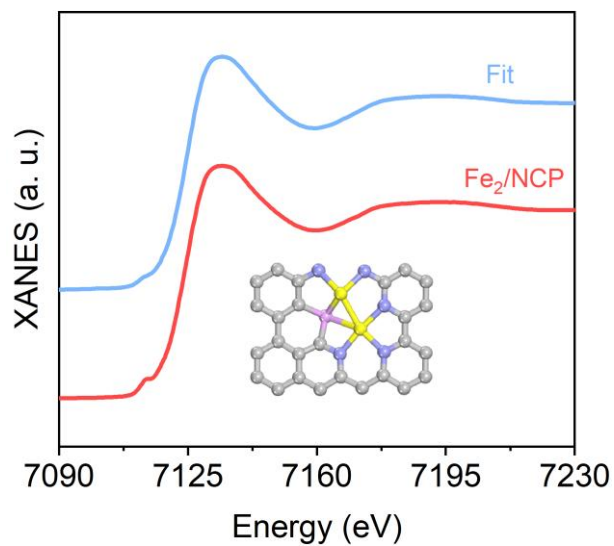

**Fig. S68.** Experimental Fe K-edge XANES spectrum of Fe<sub>2</sub>/NCP and the corresponding theoretical spectrum. Inset: the structure used to simulate the XANES spectra.

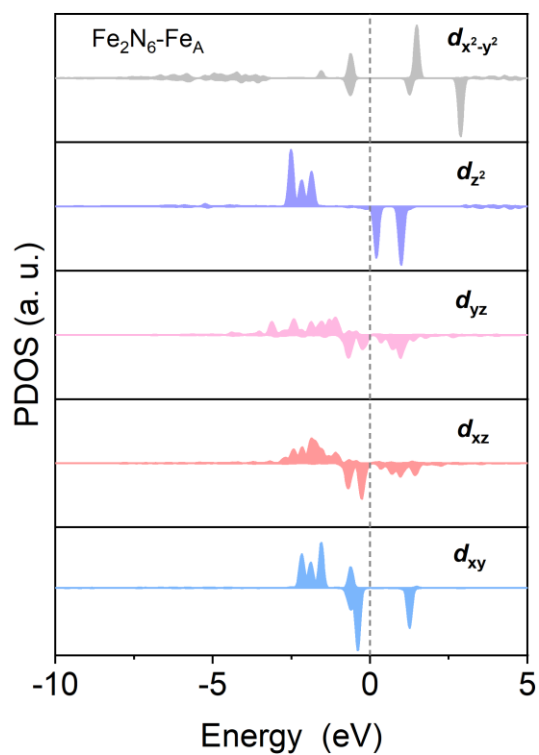

**Fig. S69.** Orbital-resolved PDOS analysis of Fe<sub>2</sub>N<sub>6</sub>-Fe<sub>A</sub>.

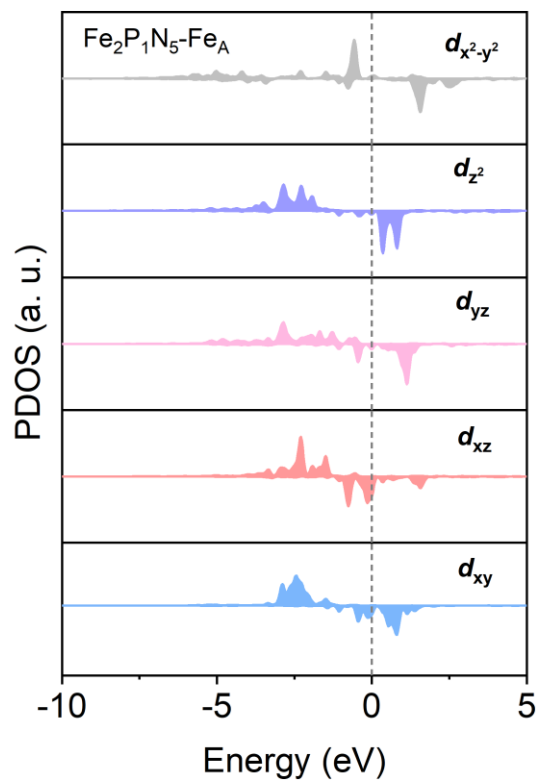

**Fig. S70.** Orbital-resolved PDOS analysis of  $\text{Fe}_2\text{P}_1\text{N}_5\text{-Fe}_A$ .

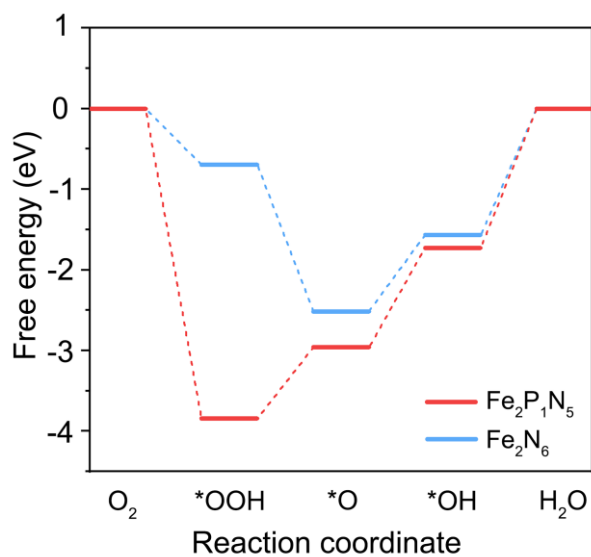

**Fig. S71.** Free energy diagrams of ORR process on  $\text{Fe}_2\text{P}_1\text{N}_5$  and  $\text{Fe}_2\text{N}_6$ .

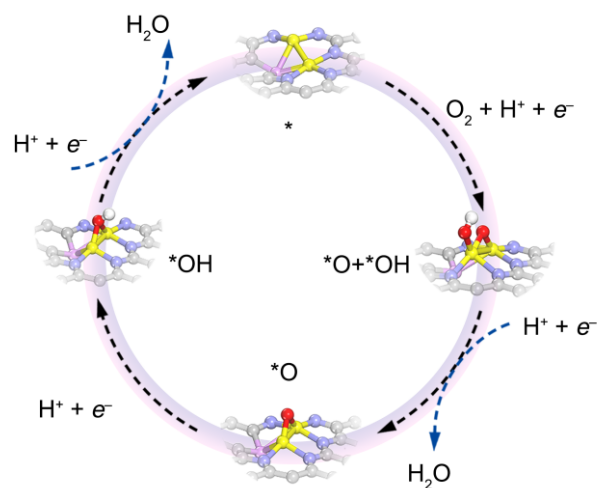

**Fig. S72.** Optimized configurations of oxygen intermediates adsorbed on Fe<sub>2</sub>P<sub>1</sub>N<sub>5</sub>.

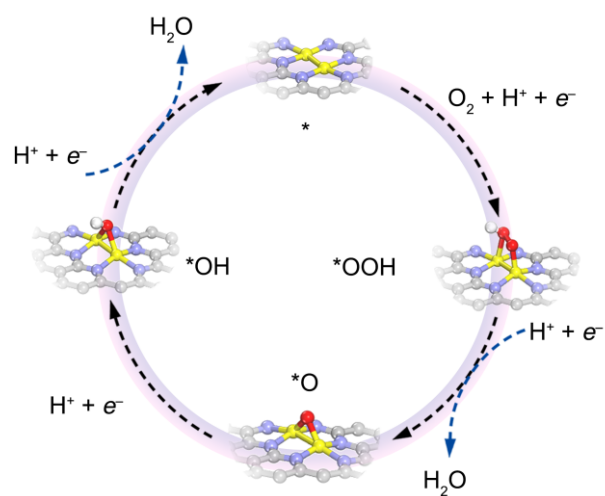

**Fig. S73.** Optimized configurations of oxygen intermediates adsorbed on Fe<sub>2</sub>N<sub>6</sub>.

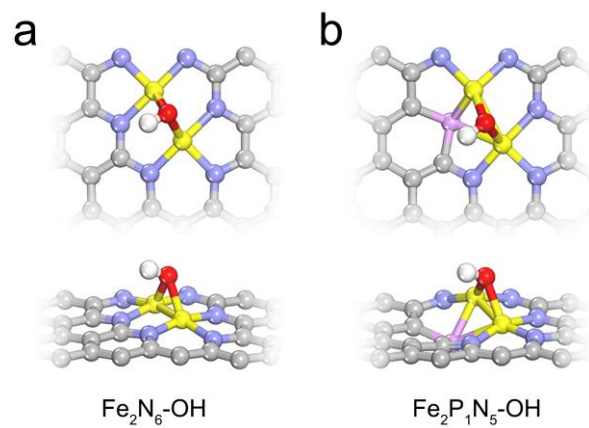

**Fig. S74.** Optimized atomic structures of (a)  $\text{Fe}_2\text{N}_6\text{-OH}$  and (b)  $\text{Fe}_2\text{P}_1\text{N}_5\text{-OH}$ .

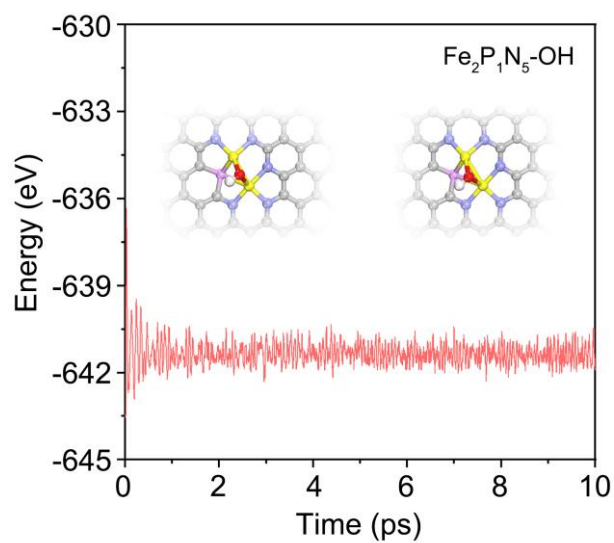

**Fig. S75.** Energy evolution of  $\text{Fe}_2\text{P}_1\text{N}_5\text{-OH}$  during 10 ps AIMD simulations at 298 K. The inset presents snapshots of the corresponding configurations at the initial and final stages of the AIMD simulations.

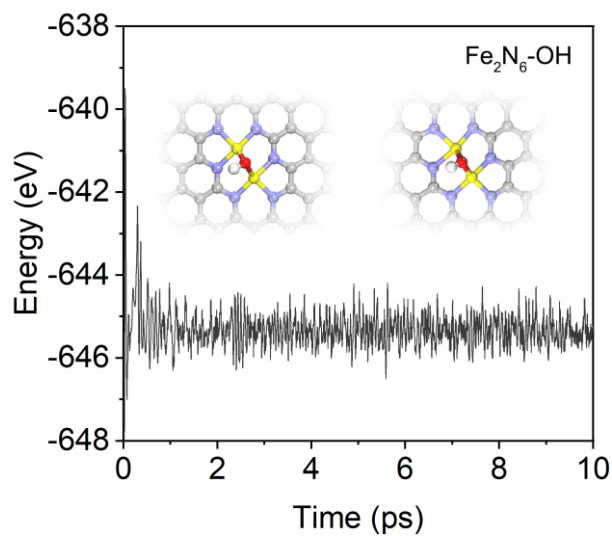

**Fig. S76.** Energy evolution of  $\text{Fe}_2\text{N}_6\text{-OH}$  during 10 ps AIMD simulations at 298 K. The inset presents snapshots of the corresponding configurations at the initial and final stages of the AIMD simulations.

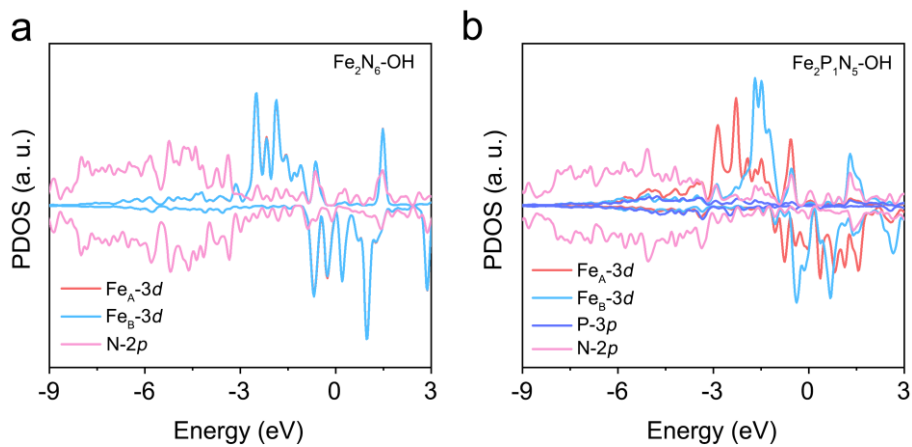

**Fig. S77.** PDOS diagrams of (a)  $\text{Fe}_2\text{N}_6\text{-OH}$  and (b)  $\text{Fe}_2\text{P}_1\text{N}_5\text{-OH}$ .

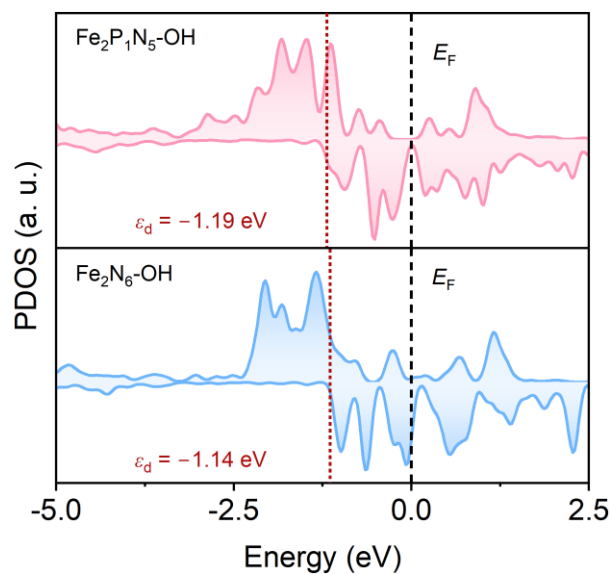

**Fig. S78.** PDOS of Fe in  $\text{Fe}_2\text{P}_1\text{N}_5\text{-OH}$  and  $\text{Fe}_2\text{N}_6\text{-OH}$  and the corresponding  $d$  band centers.

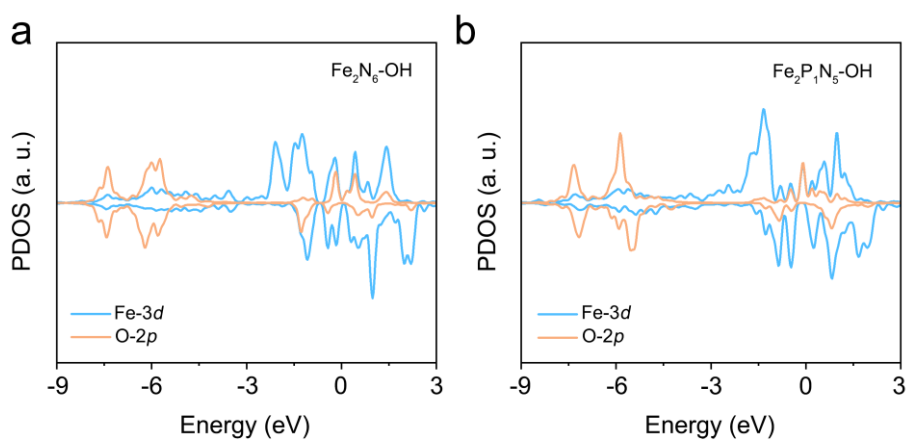

**Fig. S79.** PDOS diagrams of  $\text{O}_2$  activation on (a)  $\text{Fe}_2\text{N}_6\text{-OH}$  and (b)  $\text{Fe}_2\text{P}_1\text{N}_5\text{-OH}$ .

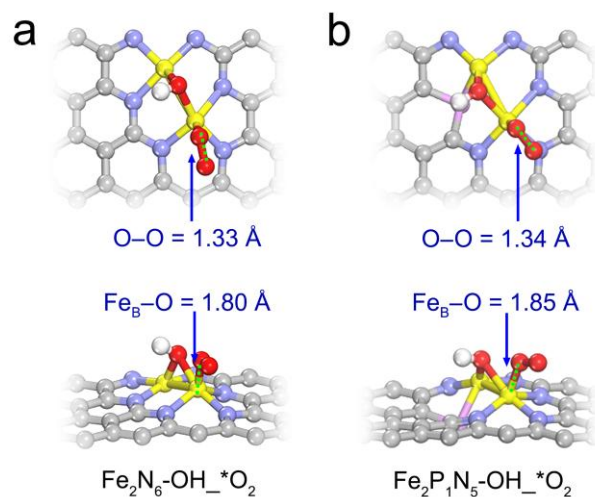

**Fig. S80.** Optimized structures of  $*O_2$  adsorbed on (a)  $Fe_2N_6-OH$  and (b)  $Fe_2P_1N_5-OH$ .

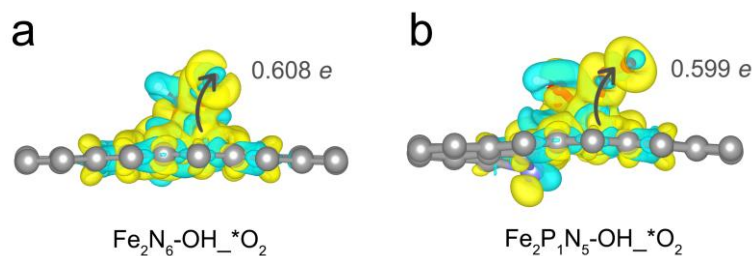

**Fig. S81.** Differential charge density and Bader charge of  $*O_2$  adsorbed on (a)  $Fe_2N_6-OH$  and (b)  $Fe_2P_1N_5-OH$ . The isosurface value is  $0.003 e\text{\AA}^{-3}$ .

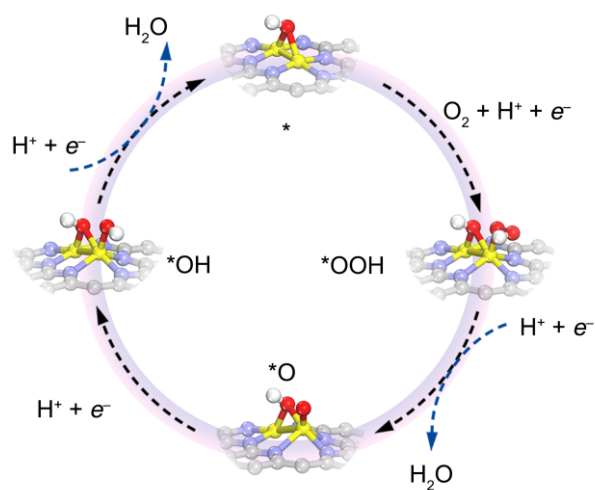

**Fig. S82.** Optimized configurations of oxygen intermediates adsorbed on Fe<sub>2</sub>N<sub>6</sub>-OH.

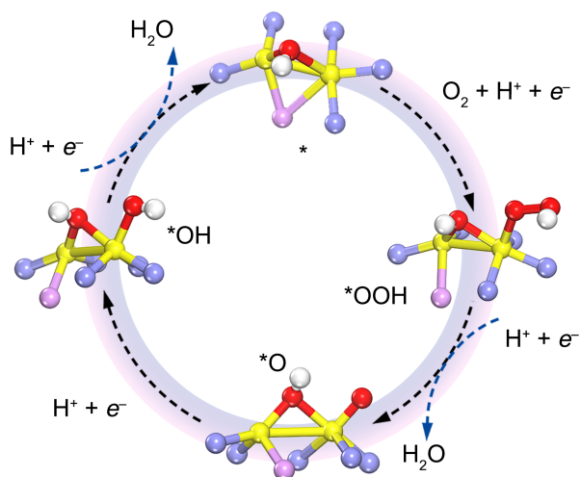

**Fig. S83.** Optimized configurations of oxygen intermediates adsorbed on Fe<sub>2</sub>P<sub>1</sub>N<sub>5</sub>-OH.

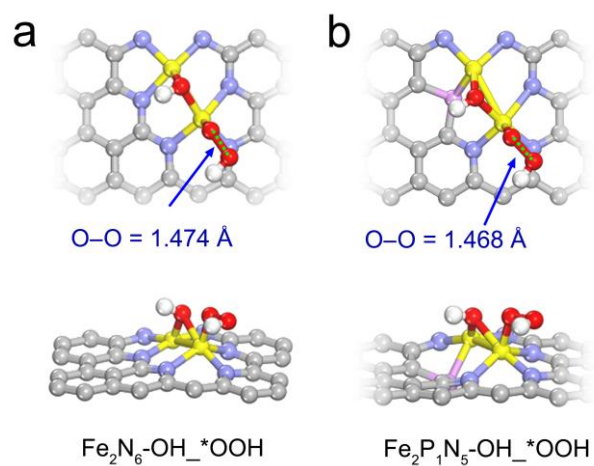

**Fig. S84.** Optimized structures of \*OOH adsorbed on (a) Fe<sub>2</sub>N<sub>6</sub>-OH and (b) Fe<sub>2</sub>P<sub>1</sub>N<sub>5</sub>-OH.

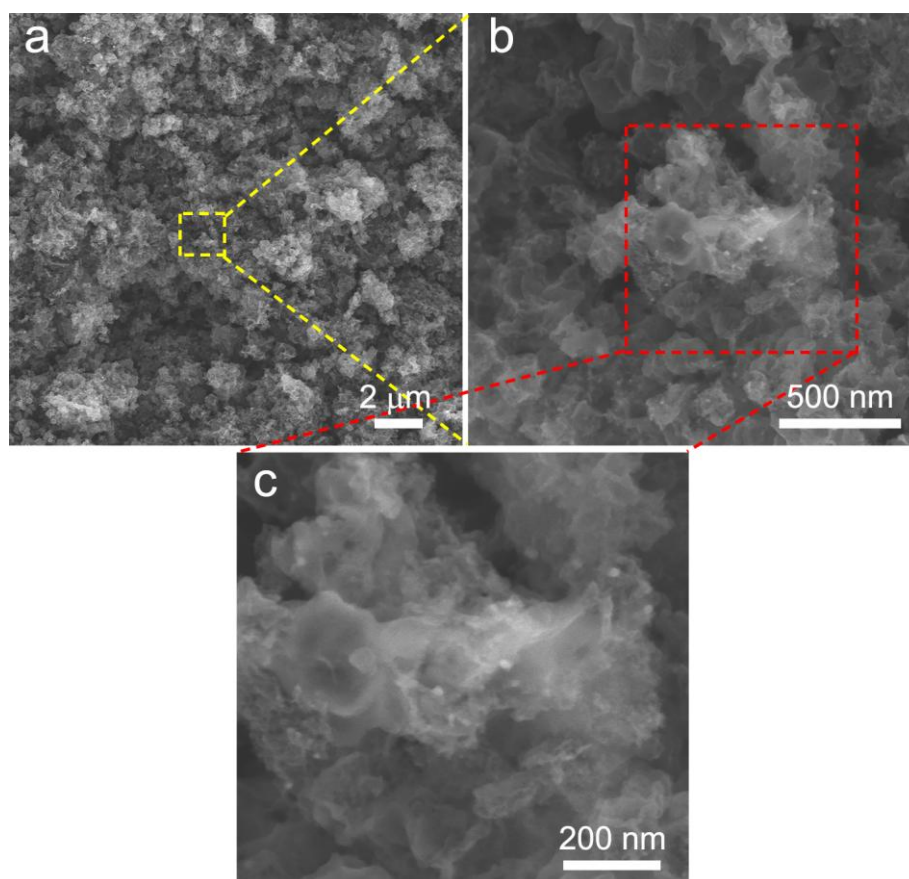

**Fig. S85.** Morphology characterization of Fe<sub>2</sub>/NCP-based zinc-air battery after 550 h charge-discharge cycling tests. (a) SEM image and (b, c) the corresponding enlarged images.

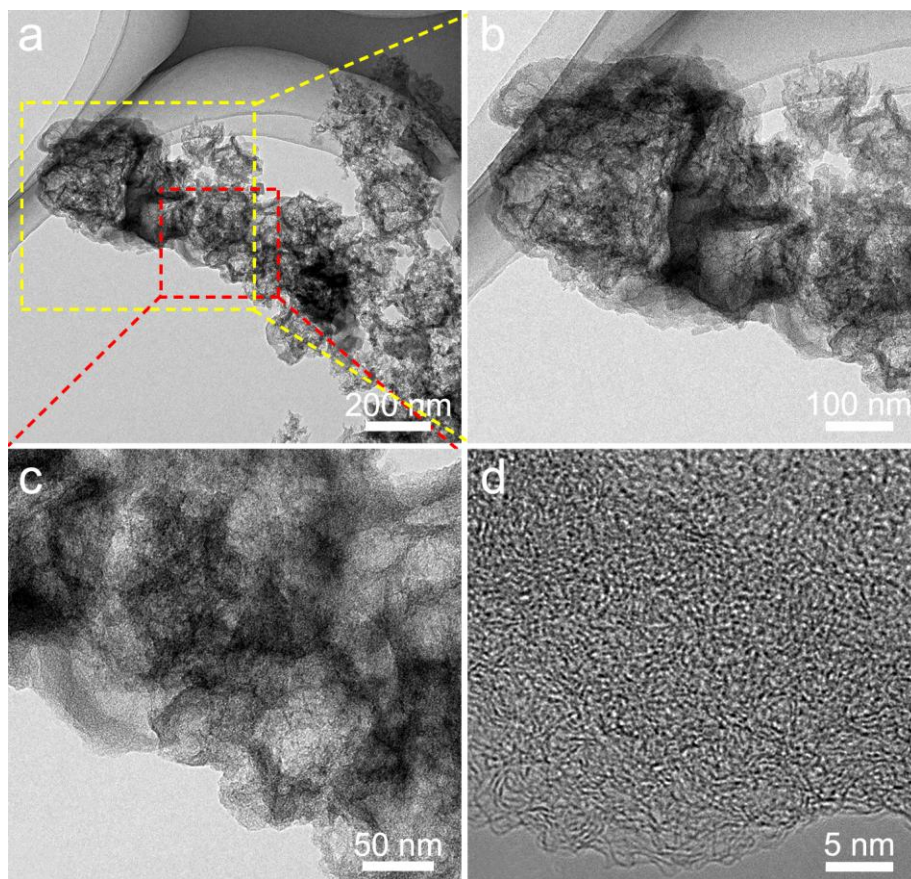

**Fig. S86.** Morphology characterization of Fe<sub>2</sub>/NCP-based zinc-air battery after 550 h charge-discharge cycling tests. (a) TEM image and (b, c) the corresponding enlarged images. (d) HR-TEM image.

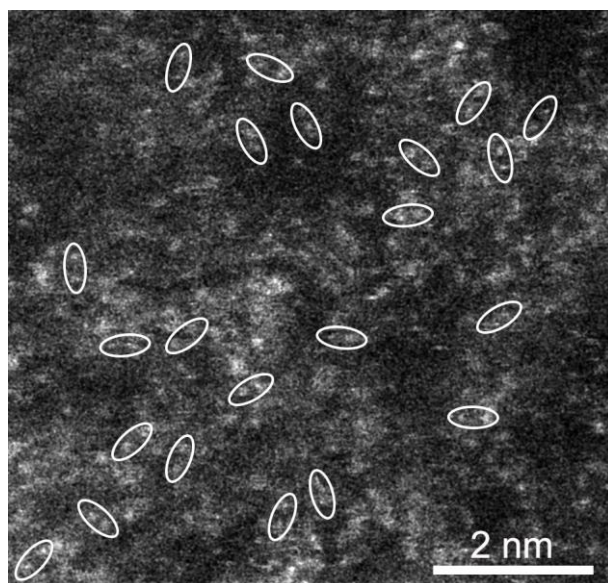

**Fig. S87.** AC HAADF-STEM image of  $\text{Fe}_2/\text{NCP}$ -based zinc-air battery after 550 h charge-discharge cycling tests.

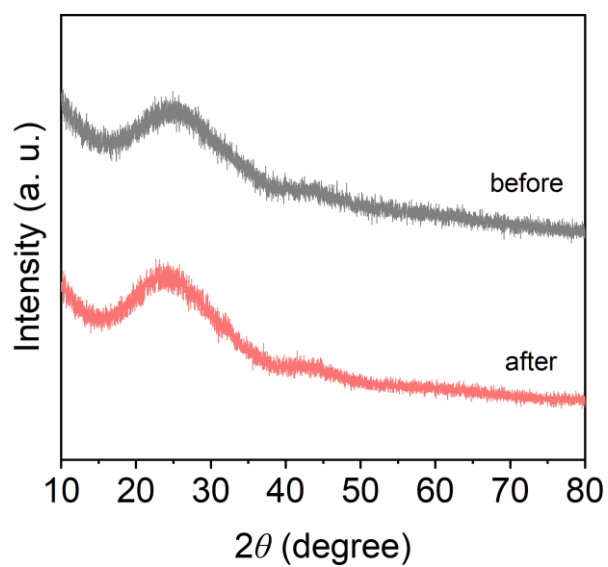

**Fig. S88.** XRD patterns of  $\text{Fe}_2/\text{NCP}$ -based zinc-air battery before and after 550 h charge-discharge cycling tests.

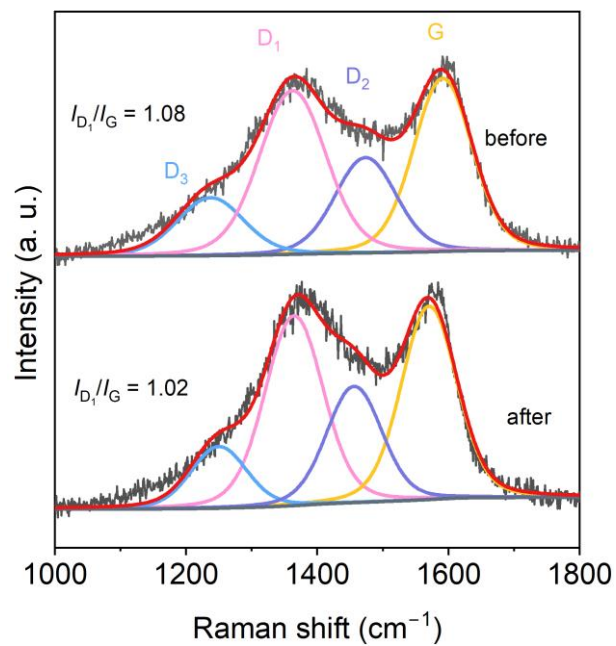

**Fig. S89.** Raman spectra of Fe<sub>2</sub>/NCP-based zinc-air battery before and after 550 h charge-discharge cycling tests.

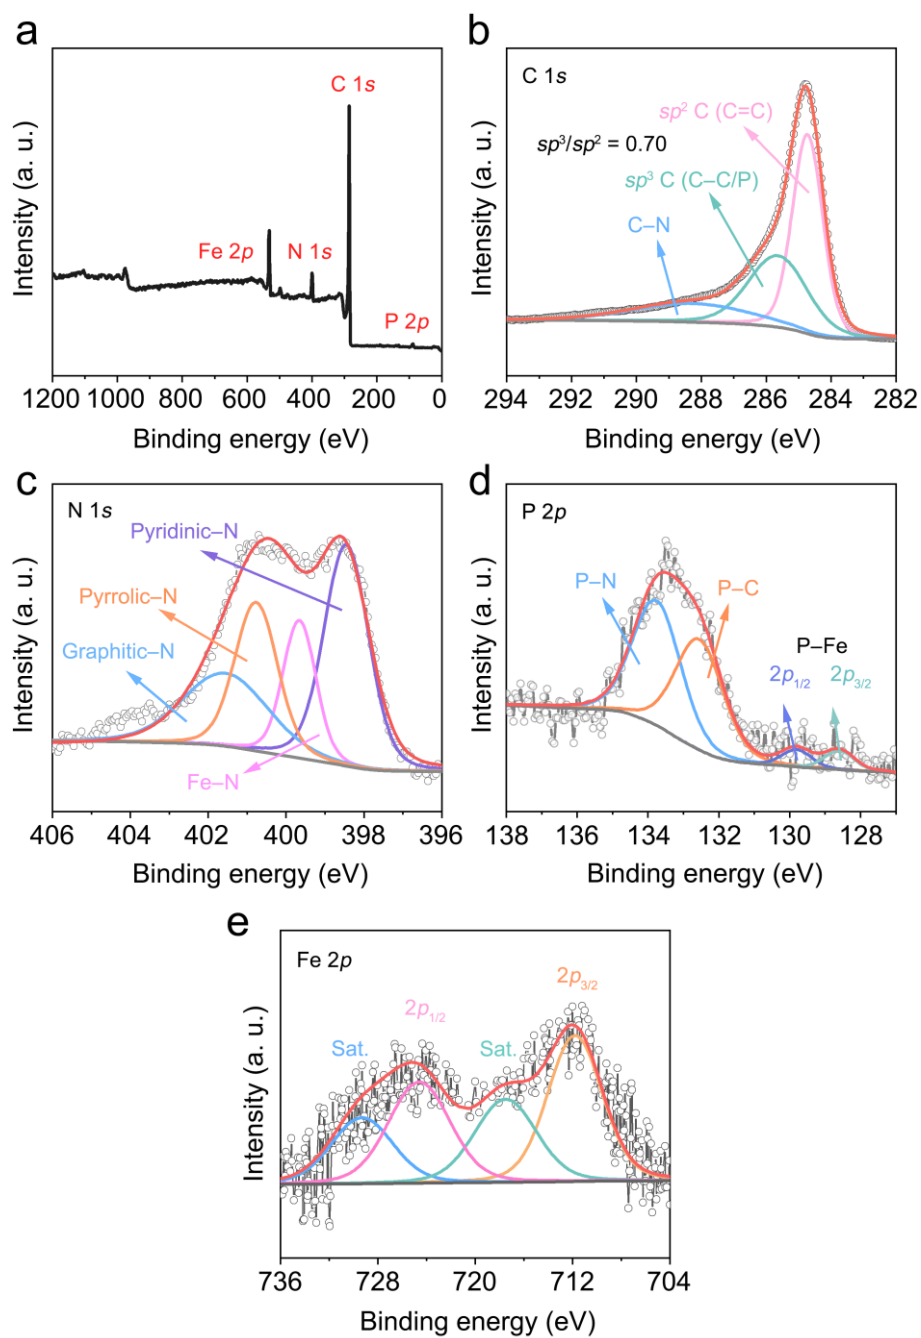

**Fig. S90.** XPS characterization of Fe<sub>2</sub>/NCP-based zinc-air battery after 550 h charge-discharge cycling tests. (a) XPS survey scan, (b) C 1s, (c) N 1s, (d) P 2p, and (e) Fe 2p spectra.

**Table S1.** Fe contents in Fe<sub>2</sub>/NCP, Fe<sub>2</sub>/NC, and Fe<sub>1</sub>/NC determined by ICP-OES.

| Sample               | Fe (wt%) |
|----------------------|----------|
| Fe <sub>2</sub> /NCP | 1.33     |
| Fe <sub>2</sub> /NC  | 1.30     |
| Fe <sub>1</sub> /NC  | 0.65     |

**Table S2.** Physical properties of samples.

| Sample               | BET surface area (m <sup>2</sup> g <sup>-1</sup> ) | Micropore surface area (m <sup>2</sup> g <sup>-1</sup> ) | External surface area (m <sup>2</sup> g <sup>-1</sup> ) | Total pore volume (cm <sup>3</sup> g <sup>-1</sup> ) |
|----------------------|----------------------------------------------------|----------------------------------------------------------|---------------------------------------------------------|------------------------------------------------------|
| Fe <sub>2</sub> /NCP | 882.5                                              | 376.5                                                    | 506.0                                                   | 1.17                                                 |
| Fe <sub>2</sub> /NC  | 847.9                                              | 439.6                                                    | 408.3                                                   | 0.98                                                 |
| Fe <sub>1</sub> /NC  | 815.1                                              | 353.5                                                    | 461.6                                                   | 1.07                                                 |
| NCP                  | 695.8                                              | 331.2                                                    | 364.6                                                   | 0.89                                                 |
| NC                   | 677.6                                              | 356.4                                                    | 321.2                                                   | 0.88                                                 |

**Table S3.** Relative ratios of the deconvoluted C species from C 1s spectra of samples.

| Sample               | $sp^2$ C (C=C) (%) | $sp^3$ C (C-C/P) (%) | C-N (%) |
|----------------------|--------------------|----------------------|---------|
| Fe <sub>2</sub> /NCP | 48.89              | 34.59                | 16.52   |
| Fe <sub>2</sub> /NC  | 47.46              | 29.90                | 22.64   |
| Fe <sub>1</sub> /NC  | 55.01              | 24.72                | 20.27   |

**Table S4.** Relative ratios of the deconvoluted N species from N 1s spectra of samples.

| Sample               | Pyridinic-N (%) | Pyrrolic-N (%) | Graphitic-N (%) | Fe-N (%) |
|----------------------|-----------------|----------------|-----------------|----------|
| Fe <sub>2</sub> /NCP | 36.21           | 28.98          | 21.45           | 13.36    |
| Fe <sub>2</sub> /NC  | 33.47           | 27.86          | 25.19           | 13.48    |
| Fe <sub>1</sub> /NC  | 36.51           | 34.51          | 17.42           | 11.56    |

**Table S5.** Structural parameters extracted from the Fe K-edge EXAFS fitting of Fe<sub>2</sub>/NCP. ( $S_0^2=0.85$ )

| Sample               | Path  | CN  | R (Å) | $\sigma^2$ ( $10^{-3}$ Å <sup>2</sup> ) | $\Delta E_0$ (eV) | R factor |
|----------------------|-------|-----|-------|-----------------------------------------|-------------------|----------|
| Fe foil              | Fe-Fe | 12* | 2.48  | 4.7                                     | 5.8               | 0.004    |
|                      | Fe-P  | 0.5 | 1.95  | 5.5                                     |                   |          |
| Fe <sub>2</sub> /NCP | Fe-N  | 2.1 | 1.86  | 6.8                                     | 4.2               | 0.009    |
|                      | Fe-Fe | 0.8 | 2.45  | 5.8                                     |                   |          |

$S_0^2$  is the amplitude reduction factor; CN is the coordination number; R is interatomic distance (the bond length between central atoms and surrounding coordination atoms);  $\sigma^2$  is Debye-Waller factor (a measure of thermal and static disorder in absorber-scatterer distances);  $\Delta E_0$  is edge energy shift (the difference between the zero kinetic energy value of the sample and that of the theoretical model). R factor is used to value the goodness of the fitting.

\* This value was fixed during EXAFS fitting, based on the known structure. Error bounds that characterize the structural parameters obtained by EXAFS spectroscopy were estimated as  $N \pm 20\%$ ;  $R \pm 1\%$ ;  $\sigma^2 \pm 20\%$ ;  $\Delta E_0 \pm 20\%$ .

**Table S6.** Comparison of ORR performance of Fe<sub>2</sub>/NCP with other previously reported non-precious metal electrocatalysts in 0.1 M KOH.

| Catalyst                                          | $E_{\text{onset}}$<br>(V vs. RHE) | $E_{1/2}$<br>(V vs. RHE) | Tafel slope<br>(mV dec <sup>-1</sup> ) | Reference                                                   |
|---------------------------------------------------|-----------------------------------|--------------------------|----------------------------------------|-------------------------------------------------------------|
| Fe <sub>2</sub> /NCP                              | <b>1.08</b>                       | <b>0.94</b>              | <b>69.8</b>                            | <b>This work</b>                                            |
| Fe <sub>2</sub> /NC                               | <b>1.03</b>                       | <b>0.90</b>              | <b>73.6</b>                            | <b>This work</b>                                            |
| Fe <sub>1</sub> /NC                               | <b>1.02</b>                       | <b>0.87</b>              | <b>67.8</b>                            | <b>This work</b>                                            |
| NCP                                               | <b>0.95</b>                       | <b>0.81</b>              | <b>75.4</b>                            | <b>This work</b>                                            |
| NC                                                | <b>0.94</b>                       | <b>0.79</b>              | <b>86.4</b>                            | <b>This work</b>                                            |
| Pt/C                                              | <b>1.02</b>                       | <b>0.86</b>              | <b>73.0</b>                            | <b>This work</b>                                            |
| SeFe-C <sub>2</sub> N                             | 1.06                              | 0.926                    | 72.0                                   | <i>Nat. Commun.</i> <b>16</b> , 470 (2025).                 |
| MnO <sub>2</sub> /Co <sub>2</sub> P@SDHC          | 0.965                             | 0.874                    | 52.44                                  | <i>Adv. Energy Mater.</i> <b>15</b> , 2405594 (2025).       |
| La <sub>2</sub> -NG                               | 0.973                             | 0.893                    | 39                                     | <i>Angew. Chem. Int. Ed.</i> <b>64</b> , e202509063 (2025). |
| FeCu-NC                                           | 1.03                              | 0.918                    | —                                      | <i>Energy Environ. Sci.</i> <b>18</b> , 7624–7634 (2025).   |
| Fe <sub>2</sub> BiN <sub>5</sub> /C               | 1.142                             | 0.918                    | 58                                     | <i>ACS Nano</i> <b>19</b> , 17863–17873 (2025).             |
| Fe <sub>SA</sub> /Fe <sub>AC</sub> @PPy/CC        | 0.97                              | 0.83                     | 75.0                                   | <i>Energy Environ. Sci.</i> <b>18</b> , 2839–2851 (2025).   |
| SbN <sub>4</sub> Cl/NC                            | 1.03                              | 0.921                    | 56                                     | <i>J. Am. Chem. Soc.</i> <b>147</b> , 21231–21240 (2025).   |
| FeCo-N-C-1.25                                     | 1.070                             | 0.853                    | 41.75                                  | <i>Angew. Chem. Int. Ed.</i> <b>64</b> , e202419595 (2025). |
| DiFe-N/CBs                                        | 1.03                              | 0.917                    | 63.2                                   | <i>Angew. Chem. Int. Ed.</i> <b>64</b> , e202413933 (2025). |
| FeOCo-SAD                                         | 1.07                              | 0.87                     | 55                                     | <i>PNAS</i> <b>121</b> , e2404013121 (2024).                |
| Co <sub>NP</sub> /CoN <sub>2</sub> -C             | 0.99                              | 0.89                     | 56.4                                   | <i>Adv. Funct. Mater.</i> <b>34</b> , 2410373 (2024).       |
| Fe <sub>x</sub> N-NC                              | 0.997                             | 0.873                    | 90.0                                   | <i>Adv. Energy Mater.</i> <b>14</b> , 2400183 (2024).       |
| CoN <sub>5</sub> /PCNF                            | 1.050                             | 0.92                     | 51.2                                   | <i>Angew. Chem. Int. Ed.</i> <b>64</b> , e202413369 (2024). |
| Cu-S <sub>1</sub> N <sub>3</sub> /Cu <sub>x</sub> | 1.04                              | 0.90                     | 59                                     | <i>Adv. Funct. Mater.</i> <b>33</b> , 2214425 (2023).       |
| Co(CN) <sub>3</sub> -Cub                          | 0.99                              | 0.90                     | 57                                     | <i>Nat. Catal.</i> <b>6</b> , 1164–1173 (2023).             |

**Table S7.** Kinetic current densities ( $J_k$ ) of samples at different potentials in 0.1 M KOH.

| Sample               | $J_k @ 0.80 \text{ V (mA cm}^{-2}\text{)}$ | $J_k @ 0.85 \text{ V (mA cm}^{-2}\text{)}$ | $J_k @ 0.90 \text{ V (mA cm}^{-2}\text{)}$ |
|----------------------|--------------------------------------------|--------------------------------------------|--------------------------------------------|
| Fe <sub>2</sub> /NCP | 56.92                                      | 37.46                                      | 12.79                                      |
| Fe <sub>2</sub> /NC  | 45.75                                      | 16.05                                      | 6.27                                       |
| Fe <sub>1</sub> /NC  | 21.97                                      | 5.34                                       | 1.36                                       |
| NCP                  | 5.82                                       | 1.56                                       | 0.34                                       |
| NC                   | 3.92                                       | 1.16                                       | 0.30                                       |
| Pt/C                 | 15.95                                      | 6.31                                       | 1.95                                       |

**Table S8.** Mass activity of samples at different potentials in 0.1 M KOH.

| Sample               | MA @ 0.80 V ( $10^3$ A g <sup>-1</sup> ) | MA @ 0.85 V ( $10^3$ A g <sup>-1</sup> ) | MA @ 0.90 V ( $10^3$ A g <sup>-1</sup> ) |
|----------------------|------------------------------------------|------------------------------------------|------------------------------------------|
| Fe <sub>2</sub> /NCP | 18.64                                    | 12.27                                    | 4.19                                     |
| Fe <sub>2</sub> /NC  | 15.33                                    | 5.38                                     | 2.10                                     |
| Fe <sub>1</sub> /NC  | 14.72                                    | 3.58                                     | 0.91                                     |
| Pt/C                 | 0.35                                     | 0.14                                     | 0.04                                     |

**Table S9.** TOF of samples at different potentials in 0.1 M KOH.

| Sample               | TOF @ 0.80 V (s <sup>-1</sup> ) | TOF @ 0.85 V (s <sup>-1</sup> ) | TOF @ 0.90 V (s <sup>-1</sup> ) |
|----------------------|---------------------------------|---------------------------------|---------------------------------|
| Fe <sub>2</sub> /NCP | 10.77                           | 7.09                            | 2.42                            |
| Fe <sub>2</sub> /NC  | 8.86                            | 3.11                            | 1.21                            |
| Fe <sub>1</sub> /NC  | 8.51                            | 2.07                            | 0.53                            |
| Pt/C                 | 0.70                            | 0.28                            | 0.09                            |

**Table S10.** Relative ratios of the deconvoluted N species from N 1s spectra of Fe<sub>2</sub>/NCP before and after 40000 potential cycles in 0.1 M KOH.

| Sample | Pyridinic-N (%) | Pyrrolic-N (%) | Graphitic-N (%) | Fe-N (%) |
|--------|-----------------|----------------|-----------------|----------|
| before | 36.21           | 28.98          | 21.45           | 13.36    |
| after  | 38.70           | 26.28          | 22.05           | 12.97    |

**Table S11.** Relative ratios of the deconvoluted C species from C 1s spectra of Fe<sub>2</sub>/NCP before and after 40000 potential cycles in 0.1 M KOH.

| Sample | <i>sp</i> <sup>2</sup> C (C=C) (%) | <i>sp</i> <sup>3</sup> C (C-C/P) (%) | C-N (%) |
|--------|------------------------------------|--------------------------------------|---------|
| before | 48.89                              | 34.59                                | 16.52   |
| after  | 49.88                              | 34.71                                | 15.41   |

**Table S12.** Relative ratios of the deconvoluted P species from P 2p spectra of Fe<sub>2</sub>/NCP before and after 40000 potential cycles in 0.1 M KOH.

| Sample | P-N (%) | P-C (%) | P-Fe (%) |
|--------|---------|---------|----------|
| before | 38.75   | 57.87   | 3.38     |
| after  | 50.34   | 44.23   | 5.43     |

**Table S13.** The equivalent circuits fitting results of Fe<sub>2</sub>/NCP at different potentials in 0.1 M KOH.

| Potential (V vs. RHE) | <i>R<sub>s</sub></i> | <i>R<sub>ct</sub></i> | <i>C<sub>dl</sub></i> | <i>R<sub>mt</sub></i> | <i>C<sub>rxn</sub></i> |
|-----------------------|----------------------|-----------------------|-----------------------|-----------------------|------------------------|
| 1.15                  | 37.8                 | 73.74                 | 0.017839              | 2.79                  | 0.050569               |
| 1.10                  | 37.85                | 63.33                 | 0.017352              | 2.178                 | 0.055932               |
| 1.05                  | 37.89                | 50.88                 | 0.016261              | 1.971                 | 0.056127               |
| 1.00                  | 37.94                | 32.61                 | 0.014465              | 1.931                 | 0.011544               |
| 0.95                  | 37.98                | 23.43                 | 0.0144                | 1.621                 | 0.052073               |
| 0.90                  | 38.01                | 15.71                 | 0.013092              | 1.433                 | 0.0036098              |
| 0.85                  | 37.96                | 33.17                 | 0.024661              | 1.226                 | 0.032344               |
| 0.80                  | 37.9                 | 57.88                 | 0.026602              | 0.80209               | 0.025087               |
| 0.75                  | 37.78                | 70.55                 | 0.0224602             | 0.50532               | 0.050569               |

**Table S14.** The equivalent circuits fitting results of Fe<sub>2</sub>/NC at different potentials in 0.1 M KOH.

| Potential (V vs. RHE) | <i>R<sub>s</sub></i> | <i>R<sub>ct</sub></i> | <i>C<sub>dl</sub></i> | <i>R<sub>mt</sub></i> | <i>C<sub>rxn</sub></i> |
|-----------------------|----------------------|-----------------------|-----------------------|-----------------------|------------------------|
| 1.10                  | 38.08                | 156.79                | 0.012664              | 4.804                 | 0.026005               |
| 1.06                  | 38.08                | 135.9                 | 0.012411              | 4.342                 | 0.024954               |
| 1.02                  | 38.07                | 111.38                | 0.012015              | 3.808                 | 0.015453               |
| 0.98                  | 38.11                | 105.72                | 0.056398              | 3.569                 | 0.013269               |
| 0.94                  | 38.19                | 92.94                 | 0.011021              | 2.676                 | 0.01173                |
| 0.90                  | 38.3                 | 78.52                 | 0.014461              | 2.075                 | 0.0084272              |
| 0.86                  | 39.1                 | 55.41                 | 0.0108                | 1.913                 | 0.0051306              |
| 0.82                  | 38.95                | 79.46                 | 0.014624              | 1.836                 | 0.0038908              |
| 0.78                  | 38.99                | 108.45                | 0.01894               | 1.712                 | 0.010242               |
| 0.74                  | 38.82                | 137.9                 | 0.020311              | 1.22                  | 0.026005               |

**Table S15.** The equivalent circuits fitting results of Fe<sub>1</sub>/NC at different potentials in 0.1 M KOH.

| Potential (V vs. RHE) | <i>R<sub>s</sub></i> | <i>R<sub>ct</sub></i> | <i>C<sub>dl</sub></i> | <i>R<sub>mt</sub></i> | <i>C<sub>rxn</sub></i> |
|-----------------------|----------------------|-----------------------|-----------------------|-----------------------|------------------------|
| 1.05                  | 38.26                | 175.7                 | 0.005942              | 6.997                 | 0.0068254              |
| 1.01                  | 38.11                | 136.7                 | 0.00762               | 5.737                 | 0.0049194              |
| 0.97                  | 38.24                | 111.8                 | 0.0067648             | 4.829                 | 0.0058039              |
| 0.93                  | 38.29                | 109.5                 | 0.0076014             | 4.732                 | 0.0051145              |
| 0.89                  | 38.42                | 93.26                 | 0.0062827             | 4.48                  | 0.0028333              |
| 0.85                  | 38.46                | 79.21                 | 0.0076227             | 4.249                 | 0.00097911             |
| 0.81                  | 38.21                | 93.69                 | 0.01333               | 3.94                  | 0.0010625              |
| 0.77                  | 38.03                | 141.61                | 0.014497              | 3.213                 | 0.0097835              |
| 0.73                  | 38.15                | 167                   | 0.015876              | 2.449                 | 0.0070438              |
| 0.69                  | 38.12                | 267.9                 | 0.01404               | 1.51                  | 0.0063246              |

**Table S16.** Comparison of ORR performance of Fe<sub>2</sub>/NCP with other previously reported non-precious metal electrocatalysts in 0.5 M H<sub>2</sub>SO<sub>4</sub>.

| Catalyst                                                                    | $E_{\text{onset}}$<br>(V vs. RHE) | $E_{1/2}$<br>(V vs. RHE) | Tafel slope<br>(mV dec <sup>-1</sup> ) | Reference                                                   |
|-----------------------------------------------------------------------------|-----------------------------------|--------------------------|----------------------------------------|-------------------------------------------------------------|
| Fe <sub>2</sub> /NCP                                                        | 0.93                              | 0.82                     | 73.8                                   | This work                                                   |
| Fe <sub>2</sub> /NC                                                         | 0.85                              | 0.73                     | 86.7                                   | This work                                                   |
| Fe <sub>1</sub> /NC                                                         | 0.86                              | 0.67                     | 107.9                                  | This work                                                   |
| NCP                                                                         | 0.83                              | 0.64                     | 112.6                                  | This work                                                   |
| NC                                                                          | 0.80                              | 0.51                     | 177.7                                  | This work                                                   |
| Pt/C                                                                        | 0.97                              | 0.84                     | 70.9                                   | This work                                                   |
| T-FeCo-N-C                                                                  | —                                 | 0.818                    | 86.95                                  | <i>Nat. Commun.</i> <b>16</b> , 7198 (2025).                |
| CA-Fe@BC                                                                    | 0.86                              | 0.78                     | 64.1                                   | <i>Nat. Commun.</i> <b>16</b> , 2920 (2025).                |
| Fe <sub>1</sub> -N <sub>4</sub> SO <sub>2</sub> /NC<br>(HClO <sub>4</sub> ) | —                                 | 0.772                    | 55                                     | <i>J. Am. Chem. Soc.</i> <b>147</b> , 6914–6924 (2025).     |
| CuFeDAC-NC<br>(HClO <sub>4</sub> )                                          | —                                 | 0.811                    | 37.55                                  | <i>Adv. Funct. Mater.</i> <b>35</b> , 2503079 (2025).       |
| FeN <sub>5</sub> -NHC<br>(HClO <sub>4</sub> )                               | 0.98                              | 0.85                     | 89.4                                   | <i>Angew. Chem. Int. Ed.</i> <b>64</b> , e202505937 (2025). |
| Zn-N-P/NPC<br>(HClO <sub>4</sub> )                                          | 0.93                              | 0.80                     | 48.3                                   | <i>Adv. Mater.</i> <b>37</b> , 2503254 (2025).              |
| Ru,Fe-NC DAS<br>(HClO <sub>4</sub> )                                        | —                                 | 0.843                    | 76                                     | <i>Energy Environ. Sci.</i> <b>17</b> , 3077–3087 (2024).   |
| FeNS/Fe <sub>3</sub> C@CNS<br>(HClO <sub>4</sub> )                          | 0.90                              | 0.78                     | 106                                    | <i>Angew. Chem. Int. Ed.</i> <b>63</b> , e202313034 (2024). |
| Fe <sub>2</sub> -S <sub>1</sub> N <sub>5</sub> /SNC<br>(HClO <sub>4</sub> ) | 0.929                             | 0.829                    | 51                                     | <i>Energy Environ. Sci.</i> <b>17</b> , 4646–4657 (2024).   |
| Fe <sub>3</sub> C-Fe <sub>1</sub> /CNT                                      | 0.93                              | 0.83                     | 75.9                                   | <i>Natl. Sci. Rev.</i> <b>11</b> , nwae193 (2024).          |
| Fe-SA/PNC                                                                   | 0.988                             | 0.842                    | 70                                     | <i>Angew. Chem. Int. Ed.</i> <b>62</b> , e202307504 (2023). |
| Fe-Zn@SNC                                                                   | 0.99                              | 0.86                     | 64                                     | <i>Angew. Chem. Int. Ed.</i> <b>62</b> , e202301833 (2023). |
| FeMn <sub>ac</sub> /Mn-N <sub>4</sub> C                                     | 0.89                              | 0.79                     | 108.5                                  | <i>Angew. Chem. Int. Ed.</i> <b>62</b> , e202214988 (2023). |
| FePCN                                                                       | 0.88                              | 0.76                     | 59.7                                   | <i>Adv. Energy Mater.</i> <b>13</b> , 2301223 (2023).       |

**Table S17.** Kinetic current densities ( $J_k$ ) of samples at different potentials in 0.5 M H<sub>2</sub>SO<sub>4</sub>.

| Sample               | $J_k$ @ 0.80 V (mA cm <sup>-2</sup> ) | $J_k$ @ 0.85 V (mA cm <sup>-2</sup> ) | $J_k$ @ 0.90 V (mA cm <sup>-2</sup> ) |
|----------------------|---------------------------------------|---------------------------------------|---------------------------------------|
| Fe <sub>2</sub> /NCP | 9.85                                  | 2.19                                  | 0.38                                  |
| Fe <sub>2</sub> /NC  | 1.05                                  | 0.37                                  | 0.08                                  |
| Fe <sub>1</sub> /NC  | 0.42                                  | 0.12                                  | 0.04                                  |
| NCP                  | 0.20                                  | 0.08                                  | 0.03                                  |
| NC                   | 0.10                                  | 0.06                                  | 0.04                                  |
| Pt/C                 | 13.51                                 | 3.92                                  | 1.00                                  |

**Table S18.** Mass activity of samples at different potentials in 0.5 M H<sub>2</sub>SO<sub>4</sub>.

| Sample               | MA @ 0.80 V (10 <sup>3</sup> A g <sup>-1</sup> ) | MA @ 0.85 V (10 <sup>3</sup> A g <sup>-1</sup> ) | MA @ 0.90 V (10 <sup>3</sup> A g <sup>-1</sup> ) |
|----------------------|--------------------------------------------------|--------------------------------------------------|--------------------------------------------------|
| Fe <sub>2</sub> /NCP | 3.23                                             | 0.727                                            | 0.124                                            |
| Fe <sub>2</sub> /NC  | 0.35                                             | 0.124                                            | 0.027                                            |
| Fe <sub>1</sub> /NC  | 0.28                                             | 0.080                                            | 0.027                                            |
| Pt/C                 | 0.29                                             | 0.085                                            | 0.022                                            |

**Table S19.** TOF of samples at different potentials in 0.5 M H<sub>2</sub>SO<sub>4</sub>.

| Sample               | TOF @ 0.80 V (s <sup>-1</sup> ) | TOF @ 0.85 V (s <sup>-1</sup> ) | TOF @ 0.90 V (s <sup>-1</sup> ) |
|----------------------|---------------------------------|---------------------------------|---------------------------------|
| Fe <sub>2</sub> /NCP | 1.86                            | 0.414                           | 0.072                           |
| Fe <sub>2</sub> /NC  | 0.20                            | 0.072                           | 0.015                           |
| Fe <sub>1</sub> /NC  | 0.16                            | 0.046                           | 0.015                           |
| Pt/C                 | 0.59                            | 0.172                           | 0.044                           |

**Table S20.** Relative ratios of the deconvoluted N species from N 1s spectra of Fe<sub>2</sub>/NCP before and after 40000 potential cycles in 0.5 M H<sub>2</sub>SO<sub>4</sub>.

| Sample | Pyridinic-N (%) | Pyrrolic-N (%) | Graphitic-N (%) | Fe-N (%) |
|--------|-----------------|----------------|-----------------|----------|
| before | 36.21           | 28.98          | 21.45           | 13.36    |
| after  | 35.33           | 26.59          | 24.23           | 13.85    |

**Table S21.** Relative ratios of the deconvoluted C species from C 1s spectra of Fe<sub>2</sub>/NCP before and after 40000 potential cycles in 0.5 M H<sub>2</sub>SO<sub>4</sub>.

| Sample | <i>sp</i> <sup>2</sup> C (C=C) (%) | <i>sp</i> <sup>3</sup> C (C-C/P) (%) | C-N (%) |
|--------|------------------------------------|--------------------------------------|---------|
| before | 48.89                              | 34.59                                | 16.52   |
| after  | 51.29                              | 35.22                                | 13.49   |

**Table S22.** Relative ratios of the deconvoluted P species from P 2p spectra of Fe<sub>2</sub>/NCP before and after 40000 potential cycles in 0.5 M H<sub>2</sub>SO<sub>4</sub>.

| Sample | P-N (%) | P-C (%) | P-Fe (%) |
|--------|---------|---------|----------|
| before | 38.76   | 57.87   | 3.37     |
| after  | 60.59   | 37.71   | 1.70     |

**Table S23.** The equivalent circuits fitting results of Fe<sub>2</sub>/NCP at different potentials in 0.5 M H<sub>2</sub>SO<sub>4</sub>.

| Potential (V vs. RHE) | <i>R<sub>s</sub></i> | <i>R<sub>ct</sub></i> | <i>C<sub>dl</sub></i> | <i>R<sub>mt</sub></i> | <i>C<sub>rxn</sub></i> |
|-----------------------|----------------------|-----------------------|-----------------------|-----------------------|------------------------|
| 1.00                  | 4.857                | 385.75                | 0.013317              | 7.677                 | 0.076598               |
| 0.95                  | 4.616                | 342.29                | 0.012927              | 6.167                 | 0.053032               |
| 0.90                  | 4.693                | 195.6                 | 0.012364              | 2.682                 | 0.019395               |
| 0.85                  | 4.644                | 162.9                 | 0.011306              | 2.578                 | 0.041904               |
| 0.80                  | 4.689                | 111.8                 | 0.01469               | 1.532                 | 0.018234               |
| 0.75                  | 4.716                | 124.2                 | 0.012664              | 0.77333               | 0.01496                |
| 0.70                  | 4.653                | 241.9                 | 0.015407              | 0.56581               | 0.006452               |
| 0.65                  | 4.675                | 256.6                 | 0.011043              | 0.53483               | 0.012492               |

**Table S24.** The equivalent circuits fitting results of Fe<sub>2</sub>/NC at different potentials in 0.5 M H<sub>2</sub>SO<sub>4</sub>.

| Potential (V vs. RHE) | <i>R<sub>s</sub></i> | <i>R<sub>ct</sub></i> | <i>C<sub>dl</sub></i> | <i>R<sub>mt</sub></i> | <i>C<sub>rxn</sub></i> |
|-----------------------|----------------------|-----------------------|-----------------------|-----------------------|------------------------|
| <b>0.95</b>           | 5.382                | 4778                  | 0.0021004             | 8.047                 | 0.051481               |
| <b>0.90</b>           | 5.352                | 1004                  | 0.0021461             | 6.309                 | 0.026288               |
| <b>0.85</b>           | 5.269                | 544                   | 0.0023031             | 4.024                 | 0.017034               |
| <b>0.80</b>           | 5.273                | 353.9                 | 0.0027365             | 2.423                 | 0.017968               |
| <b>0.75</b>           | 5.35                 | 351.1                 | 0.0033863             | 2.206                 | 0.0082054              |
| <b>0.70</b>           | 5.391                | 412.6                 | 0.0036771             | 1.429                 | 0.005566               |
| <b>0.65</b>           | 5.388                | 509.8                 | 0.0035979             | 1.252                 | 0.0042431              |
| <b>0.60</b>           | 5.357                | 764                   | 0.0034017             | 1.637                 | 0.0032626              |
| <b>0.55</b>           | 5.267                | 970.8                 | 0.0031996             | 1.047                 | 0.0094711              |

**Table S25.** The equivalent circuits fitting results of Fe<sub>1</sub>/NC at different potentials in 0.5 M H<sub>2</sub>SO<sub>4</sub>.

| Potential (V vs. RHE) | <i>R<sub>s</sub></i> | <i>R<sub>ct</sub></i> | <i>C<sub>dl</sub></i> | <i>R<sub>mt</sub></i> | <i>C<sub>rxn</sub></i> |
|-----------------------|----------------------|-----------------------|-----------------------|-----------------------|------------------------|
| <b>0.95</b>           | 6.885                | 8258                  | 0.001973              | 10.05                 | 0.0075845              |
| <b>0.90</b>           | 7.009                | 2494                  | 0.0020625             | 6.835                 | 0.0074355              |
| <b>0.85</b>           | 6.978                | 1086                  | 0.0021515             | 6.507                 | 0.0069616              |
| <b>0.80</b>           | 7.063                | 750.2                 | 0.002305              | 6.785                 | 0.0072531              |
| <b>0.75</b>           | 6.926                | 614                   | 0.002704              | 4.798                 | 0.0049437              |
| <b>0.70</b>           | 6.962                | 576.6                 | 0.0030274             | 4.035                 | 0.0041211              |
| <b>0.65</b>           | 6.87                 | 634.6                 | 0.0032529             | 3.345                 | 0.0033875              |
| <b>0.60</b>           | 6.884                | 1051                  | 0.0033229             | 3.045                 | 0.0029116              |
| <b>0.55</b>           | 6.875                | 1538                  | 0.0034589             | 2.823                 | 0.0012966              |

**Table S26.** Zero-point energy ( $E_{\text{ZPE}}$ ) and entropy contribution ( $TS$ ) of the reaction intermediates.

| Species         | $E_{\text{ZPE}}$ (eV) | $TS$ (eV) |
|-----------------|-----------------------|-----------|
| *O <sub>2</sub> | 0.14                  | 0.15      |
| *OOH            | 0.44                  | 0.18      |
| *O              | 0.07                  | 0.07      |
| *OH             | 0.35                  | 0.10      |

**Table S27.** Comparison of Zn-air battery performance between Fe<sub>2</sub>/NCP and other previously reported non-precious metal electrocatalysts.

| Catalyst                              | OCP (V) | Peak power density (mW cm <sup>-2</sup> ) | Specific capacity (mAh g <sup>-1</sup> ) | Reference                                                   |
|---------------------------------------|---------|-------------------------------------------|------------------------------------------|-------------------------------------------------------------|
| Fe <sub>2</sub> /NCP                  | 1.58    | 300.4                                     | 733.8 (20 mA cm <sup>-2</sup> )          | This work                                                   |
| Fe <sub>2</sub> /NC                   | 1.54    | 230.5                                     | 688.1 (20 mA cm <sup>-2</sup> )          | This work                                                   |
| Fe <sub>1</sub> /NC                   | 1.48    | 204.1                                     | 647.6 (20 mA cm <sup>-2</sup> )          | This work                                                   |
| Pt/C+RuO <sub>2</sub>                 | 1.43    | 109.4                                     | 617.0 (20 mA cm <sup>-2</sup> )          | This work                                                   |
| CoCo-BiSalphen@KB                     | 1.512   | 215.7                                     | 800.6 (100 mA cm <sup>-2</sup> )         | <i>Nat. Commun.</i> <b>16</b> , 921 (2025).                 |
| SbN <sub>4</sub> Cl/NC                | 1.49    | 193                                       | 793 (15 mA cm <sup>-2</sup> )            | <i>J. Am. Chem. Soc.</i> <b>147</b> , 21231–21240 (2025).   |
| Co-N-Mn/NC                            | 1.51    | 271                                       | 805(10 mA cm <sup>-2</sup> )             | <i>Nat. Commun.</i> <b>16</b> , 5158 (2025).                |
| CoMn-NSC                              | 1.56    | 152.2                                     | —                                        | <i>Adv. Funct. Mater.</i> <b>35</b> , 2504260 (2025).       |
| FeCu-NC                               | 1.53    | 250.3                                     | 787 (20 mA cm <sup>-2</sup> )            | <i>Energy Environ. Sci.</i> <b>18</b> , 7624–7634 (2025).   |
| Co <sub>3</sub> -NG                   | 1.48    | 189.0                                     | 770.3 (10 mA cm <sup>-2</sup> )          | <i>Angew. Chem. Int. Ed.</i> <b>64</b> , e202503019 (2025). |
| Co-FNC                                | 1.55    | 246                                       | 817 (10 mA cm <sup>-2</sup> )            | <i>ACS Nano</i> <b>18</b> , 11474–11486 (2024).             |
| CR-Co/CINC                            | 1.50    | 176.6                                     | 745 (10 mA cm <sup>-2</sup> )            | <i>Nat. Commun.</i> <b>15</b> , 1675 (2024).                |
| ZnCoFe-TAC/SNC                        | 1.40    | 304                                       | 760 (5 mA cm <sup>-2</sup> )             | <i>Energy Environ. Sci.</i> <b>17</b> , 2298–2308 (2024).   |
| FeCo-SAs                              | 1.475   | 203.36                                    | 805.46 (10 mA cm <sup>-2</sup> )         | <i>ACS Nano</i> <b>18</b> , 13006–13018 (2024).             |
| FeSAs+NPsCeSAs+Fe-ONPs/NC             | 1.55    | 240.5                                     | 788.2 (10 mA cm <sup>-2</sup> )          | <i>Angew. Chem. Int. Ed.</i> <b>63</b> , e202400765 (2024). |
| c-CoSe <sub>2</sub> -CoN/NC           | 1.52    | 118                                       | 802 (10 mA cm <sup>-2</sup> )            | <i>Adv. Mater.</i> <b>36</b> , 2306844 (2024).              |
| FeCo-DSA/AC                           | 1.489   | 174.1                                     | 793.30 (10 mA cm <sup>-2</sup> )         | <i>Angew. Chem. Int. Ed.</i> <b>63</b> , e202412566 (2024). |
| FeCo-N <sub>3</sub> O <sub>3</sub> @C | 1.43    | 143                                       | 787.2 (10 mA cm <sup>-2</sup> )          | <i>Nat. Synth.</i> <b>3</b> , 878–890 (2024).               |
| Fe <sub>2</sub> -pPc                  | 1.446   | 255                                       | 791 (10 mA cm <sup>-2</sup> )            | <i>J. Am. Chem. Soc.</i> <b>146</b> , 24842–24854 (2024).   |

**Table S28.** Relative ratios of the deconvoluted N species from N 1s spectra of Fe<sub>2</sub>/NCP-based zinc-air battery before and after 550 h charge-discharge cycling tests.

| Sample | Pyridinic-N (%) | Pyrrolic-N (%) | Graphitic-N (%) | Fe-N (%) |
|--------|-----------------|----------------|-----------------|----------|
| before | 36.21           | 28.98          | 21.45           | 13.36    |
| after  | 36.86           | 26.02          | 19.35           | 17.77    |

**Table S29.** Relative ratios of the deconvoluted C species from C 1s spectra of Fe<sub>2</sub>/NCP-based zinc-air battery before and after 550 h charge-discharge cycling tests.

| Sample | <i>sp</i> <sup>2</sup> C (C=C) (%) | <i>sp</i> <sup>3</sup> C (C-C/P) (%) | C-N (%) |
|--------|------------------------------------|--------------------------------------|---------|
| before | 48.89                              | 34.59                                | 16.52   |
| after  | 48.31                              | 33.81                                | 17.88   |

**Table S30.** Relative ratios of the deconvoluted P species from P 2p spectra of Fe<sub>2</sub>/NCP-based zinc-air battery before and after 550 h charge-discharge cycling tests.

| Sample | P-N (%) | P-C (%) | P-Fe (%) |
|--------|---------|---------|----------|
| before | 38.75   | 57.87   | 3.38     |
| after  | 48.39   | 42.86   | 8.75     |

**Table S31.** Comparison of the performance of flexible quasi-solid-state zinc-air batteries powered by Fe<sub>2</sub>/NCP versus other reported non-precious metal electrocatalysts.

| Catalyst                                                  | GPEs        | OCP (V) | Peak power density (mW cm <sup>-2</sup> ) | Reference                                                   |
|-----------------------------------------------------------|-------------|---------|-------------------------------------------|-------------------------------------------------------------|
| Fe <sub>2</sub> /NCP                                      | PVA         | 1.40    | 166.9                                     | This work                                                   |
| Fe <sub>2</sub> /NC                                       | PVA         | 1.37    | 136.0                                     | This work                                                   |
| Fe <sub>1</sub> /NC                                       | PVA         | 1.32    | 114.1                                     | This work                                                   |
| Pt/C+RuO <sub>2</sub>                                     | PVA         | 1.26    | 70.4                                      | This work                                                   |
| Fe-SAs/MPC                                                | PVA         | 1.47    | 198                                       | <i>Angew. Chem. Int. Ed.</i> <b>64</b> , e202501307 (2025). |
| Co <sub>AC</sub> -Mo <sub>x</sub> C/CC                    | PAA         | 1.47    | 103.4                                     | <i>Adv. Funct. Mater.</i> <b>35</b> , 2506077 (2025).       |
| MnO <sub>2</sub> /Co <sub>2</sub> P@SDHC                  | PAM         | 1.47    | 75                                        | <i>Adv. Energy Mater.</i> <b>15</b> , 2405594 (2025).       |
| Fe-N <sub>4</sub> /N <sub>GC</sub> -C                     | PANa        | 1.43    | 136                                       | <i>Natl. Sci. Rev.</i> <b>12</b> , nwaf061 (2025).          |
| NiCo <sub>2</sub> S <sub>4</sub> @NiFe LDH/N-rGO          | PAA         | 1.44    | 111                                       | <i>Energy Environ. Sci.</i> <b>18</b> , 991–1001 (2025).    |
| SA-Cu@NCA                                                 | PVA         | 1.42    | 98.5                                      | <i>ACS Nano</i> <b>19</b> , 23859–23868 (2025).             |
| Fe <sub>x</sub> /FeN <sub>3</sub> S <sub>1</sub> -C       | CNF@PVA-SSE | 1.46    | 96.54                                     | <i>Energy Environ. Sci.</i> <b>17</b> , 4746–4757 (2024).   |
| NiCo <sub>1.8</sub> Fe <sub>0.2</sub> O <sub>4</sub> @NCF | PVA         | 1.46    | 80                                        | <i>Angew. Chem. Int. Ed.</i> <b>63</b> , e202319983 (2024). |
| CoFe/AC                                                   | PAM-SC      | 1.37    | 107.64                                    | <i>Angew. Chem. Int. Ed.</i> <b>62</b> , e202301114 (2023). |
| Co <sub>9</sub> S <sub>8</sub> -NSABP                     | PANa-PVA-IL | 1.475   | 198                                       | <i>Adv. Mater.</i> <b>35</b> , 2209980 (2023).              |
| Fe <sub>3</sub> Co <sub>7</sub> -NC                       | PAA         | 1.51    | 133                                       | <i>Adv. Funct. Mater.</i> <b>33</b> , 2212299 (2023).       |
| Nd/Co@NC                                                  | PAA         | 1.36    | 70.6                                      | <i>Adv. Energy Mater.</i> <b>13</b> , 2203244 (2023).       |
